# Supplementary material for: Associations of Skeletal Muscle Mass and Fat Mass With Incident Cardiovascular Disease and All‐Cause Mortality: A Prospective Cohort Study of UK Biobank Participants
Source: PubMed Central journal article supplement — J Am Heart Assoc. 2021 Apr 19;10(9):e019337. doi: 10.1161/JAHA.120.019337 (PMC8200765; doi:10.1161/jaha.120.019337), 2021-04-19
Supplement: JAH3-10-e019337-s001.pdf [file JAH3-10-e019337-s001.pdf]

# **SUPPLEMENTAL MATERIAL**

Data S1.

## Systematic literature review

Search terms used on PubMed and Embase (up to 18<sup>th</sup> October 2019):

("muscle mass" or "skeletal muscle" or "sarcopenia" or "fat mass" or "body fat" or "body composition" or "fat free mass" or "lean mass" or "adiposity") AND ("mortality" or "death" or "survival" or "cardiovascular disease" or "CVD" or "stroke" or "coronary heart disease" or "congestive heart failure")

Studies were excluded if they were done in patients or ill people (including but not limited to hospitalised, intensive care or dialysis patients, those with cancer, diabetes, COPD, CKD, dementia, HIV), done in children or adolescents, investigating a diet or exercise intervention, done in animals, molecular, cellular-level studies, or genetic studies. Only findings from prospective cohort studies published after 2000 with more than 600 participants are presented below.

Table S1. Summary of search findings.

| Exposure             | Outcome             | Sex                    | Number of associations identified in studies |          |          |               |
|----------------------|---------------------|------------------------|----------------------------------------------|----------|----------|---------------|
|                      |                     |                        | Null                                         | Negative | Positive | U or J-shaped |
| Muscle mass          | All-cause mortality | Combined men and women | 7                                            | 8        | 3        |               |
|                      |                     | Men only               | 10                                           | 7        | 1        | 3             |
|                      |                     | Women only             | 10                                           | 9        | 1        | 2             |
| Muscle mass          | CVD                 | Combined men and women | 2                                            | 2        | 2        |               |
|                      |                     | Men only               | 7                                            | 2        | 1        |               |
|                      |                     | Women only             | 5                                            | 2        | 1        |               |
| Fat mass             | All-cause mortality | Combined men and women | 7                                            | 2        | 3        |               |
|                      |                     | Men only               | 12                                           | 4        | 17       | 5             |
|                      |                     | Women only             | 13                                           | 10       | 19       | 3             |
| Fat mass             | CVD                 | Combined men and women | 2                                            | 1        | 10       | 3             |
|                      |                     | Men only               | 11                                           | 2        | 16       |               |
|                      |                     | Women only             | 12                                           |          | 13       |               |
| Low muscle, high fat | All-cause mortality | Combined men and women |                                              |          | 1        |               |
|                      |                     | Men only               | 2                                            |          | 2        |               |
|                      |                     | Women only             | 2                                            |          | 1        |               |
| High Muscle, low fat | All-cause mortality | Combined men and women |                                              | 1        |          |               |
|                      |                     | Men only               |                                              |          |          |               |
|                      |                     | Women only             |                                              |          |          |               |
| Low Muscle, high fat | CVD                 | Combined men and women |                                              |          | 1        |               |
|                      |                     | Men only               | 1                                            |          |          |               |
|                      |                     | Women only             | 1                                            |          |          |               |
| High muscle, low fat | CVD                 | Combined men and women |                                              | 1        |          |               |
|                      |                     | Men only               |                                              |          |          |               |
|                      |                     | Women only             |                                              |          |          |               |

Each association assessed in the studies is counted distinctly (i.e. the number of associations exceeds the number of studies identified since some studies analysed more than one exposure/outcome combination). 'Muscle mass' includes studies that assessed measurements of lean mass from techniques such as bioimpedance analysis (BIA), dual energy x-ray absorptiometry (DEXA), mid upper arm circumference and calf circumference (it does not include studies of muscle quality such as grip strength). 'Fat mass' includes studies that assessed measurement of adiposity such as fat mass as determined by BIA or DEXA, percentage body fat, waist circumference, waist to hip ratio. Studies of BMI or body fat distribution indices are not included.

Table S2. Systematic literature review.

| Reference | Study name (date of recruitment) | Study participants (location, N, age)                                     | Body composition measurement   | Exposure definition/coding                                                                        | Outcome                                                                                                                                                                                                                                                                                          | Shape of association                           |                                                                                                                                                                                                                                                                                                                                                                                                                   |
|-----------|----------------------------------|---------------------------------------------------------------------------|--------------------------------|---------------------------------------------------------------------------------------------------|--------------------------------------------------------------------------------------------------------------------------------------------------------------------------------------------------------------------------------------------------------------------------------------------------|------------------------------------------------|-------------------------------------------------------------------------------------------------------------------------------------------------------------------------------------------------------------------------------------------------------------------------------------------------------------------------------------------------------------------------------------------------------------------|
| 68        | Abramowitz, et al. (2018)        | NHANES (1999-2004)                                                        | USA, n=11687 aged >20 yrs      | DEXA (Appendicular skeletal muscle mass)                                                          | Low muscle defined as ASMI <5.45kg/m <sup>2</sup> (women) or <7.26kg/m <sup>2</sup> (men) [2,3]                                                                                                                                                                                                  | All-cause mortality                            | BMI and mortality: U (low muscle group), 0 (preserved muscle group)<br>ASMI and mortality (men and women combined): -                                                                                                                                                                                                                                                                                             |
| 69        | Allison, et al. (2002)           | NHANES I & II                                                             | USA, n=10169 men aged 25-75yrs | Skinfolds (indicator of fat mass), upper arm circumference (fat free mass indicator), BMI         | Modelled continuously                                                                                                                                                                                                                                                                            | All-cause mortality                            | BMI and all-cause mortality: U (men)<br>Fat free mass and mortality: linear - (men)<br>Fat mass and mortality: linear + (men)                                                                                                                                                                                                                                                                                     |
| 70        | Andersen, et al. (2015)          | Shanghai Men's Health Study and Shanghai Women's Health Study (1996-2000) | China, n=116442 aged 40-74yrs  | Waist to hip ratio                                                                                | Quintiles of WHR                                                                                                                                                                                                                                                                                 | All-cause and CVD mortality                    | WHR and mortality: linear + (men)<br>WHR and mortality: linear + (women)<br>WHR and CVD mortality: linear + (men)<br>WHR and CVD mortality: linear + (women)                                                                                                                                                                                                                                                      |
| 71        | Atkins, et al. (2014)            | NHANES (1999-2004)                                                        | USA, n=11687 aged >20yrs       | Waist circumference, midupper arm circumference, triceps skinfold thickness                       | 4 groups created:<br>Optimal (MAMC >25.9cm and WC ≤102cm), sarcopenic (MAMC ≤25.9cm and WC ≤102cm), sarcopenic obese (MAMC ≤25.9cm and WC >102cm), obese (WC >102cm and MAMC >25.9cm)                                                                                                            | All-cause mortality, CVD mortality, CVD events | Sarcopenia and mortality: 0 (men)<br>Sarcopenia and mortality: + (women)<br>Sarcopenia and CVD: 0 (men)<br>Sarcopenia and CVD: + (women)                                                                                                                                                                                                                                                                          |
| 72        | Bachettini et al. (2019)         | n/a                                                                       | Brazil, n=1291 aged ≥60 years  | Using the European Working Group on Sarcopenia in Older People (EWGSOP) definitions of sarcopenia | Sarcopenia, binary                                                                                                                                                                                                                                                                               | All-cause mortality                            | Severe sarcopenia and mortality: + (men and women combined)<br>Other sarcopenia and mortality: 0 (men and women combined)                                                                                                                                                                                                                                                                                         |
| 73        | Balogun, et al. (2017)           | Tasmanian Older Adult Cohort study                                        | Tasmania, n=1099 aged >50yrs   | DEXA (Appendicular lean mass), lower limb strength                                                | Calculated ALM/height <sup>2</sup> [2], ALM/BMI [1], ALM/weight*100 [12] from DEXA. Measured grip, lower-limb muscle, and upper-limb muscle strength and/or quality. Low muscle mass or function defined as participants in the lowest 20% of the sex-specific distribution for each measurement | Mortality, falls, fracture                     | Muscle strength or quality and mortality (men and women combined): 0<br>Low appendicular lean mass/BMI and mortality (men and women combined): +<br>Low appendicular lean mass/height <sup>2</sup> and mortality (men and women combined): 0<br>Low appendicular lean mass/weight and mortality (men and women combined): 0                                                                                       |
| 74        | Batsis, et al. (2014)            | NHANES III (1988-1994)                                                    | USA, n=4652 aged >60years      | BIA (skeletal muscle index, % body fat)                                                           | 4 definitions used:<br>Normal if SMI ≥10.76kg/m <sup>2</sup> (men) >6.76kg/m <sup>2</sup> (women);<br>Class I sarcopenia if SMI 8.51–10.75 (men) 5.76–6.75 (women);<br>Class II sarcopenia: ≤8.50 kg/m <sup>2</sup> ≤5.75 [17].<br>Obesity defined as body fat >27% (men) >38% (women) [3]       | All-cause mortality                            | Sarcopenia only and mortality: 0 (men)<br>Sarcopenia only and mortality: + (women)<br>Sarcopenic obese and mortality: 0 (men)<br>Sarcopenic obese and mortality: 0 (women)<br>Obese only and mortality: 0 (men)<br>Obese only and mortality: 0 (women)                                                                                                                                                            |
| 45        | Batsis, et al. (2017)            | NHAHES (1999-2004)                                                        | USA, n=4984 aged >60 yrs       | DEXA (Appendicular lean mass), waist circumference, BMI                                           | Low lean mass defined as: ALM <19.75kg (men) <15.02kg (women) [1] or ALM:BMI <0.789 (men), <0.512 (women).<br>Obesity defined as body fat >25% (men) >35% (women) [9].                                                                                                                           | All-cause and CVD mortality                    | Low lean mass and mortality: + (men)<br>Low lean mass and mortality: 0 (women)<br>Low lean mass and CVD: + (men)<br>Low lean mass and CVD: 0 (women)<br>Low lean mass with obesity and mortality: + (men)<br>Low lean mass with obesity and mortality: 0 (women)<br>Low lean mass with obesity and CVD : 0 (men)<br>Low lean mass with obesity and CVD : 0 (women)<br>Obesity (body fat %) and mortality: - (men) |

|    |                         |                                           |                                                   |                                                                                                                              |                                                                                                                                                                                                                                                                                                                                     |                                             |                                                                                                                                                                                                                                                  |
|----|-------------------------|-------------------------------------------|---------------------------------------------------|------------------------------------------------------------------------------------------------------------------------------|-------------------------------------------------------------------------------------------------------------------------------------------------------------------------------------------------------------------------------------------------------------------------------------------------------------------------------------|---------------------------------------------|--------------------------------------------------------------------------------------------------------------------------------------------------------------------------------------------------------------------------------------------------|
|    |                         |                                           |                                                   |                                                                                                                              |                                                                                                                                                                                                                                                                                                                                     |                                             | Obesity (body fat %) and mortality: - (women)<br>Obesity (body fat %) and CVD: 0 (men)<br>Obesity (body fat %) and CVD: 0 (women)                                                                                                                |
| 75 | Bea, et al. (2015)      | Women's Health Initiative (1993-1998)     | USA, n=10525 postmenopausal women aged 50-79yrs   | DEXA (total body fat %, lean body mass %), BMI                                                                               | Quintiles of each exposure                                                                                                                                                                                                                                                                                                          | All-cause mortality                         | Fat mass and mortality (women aged 50-59): linear +<br>Fat mass and mortality (women aged >70): linear -<br>Lean mass and mortality (women aged 50-59): linear -<br>Lean mass and mortality (women aged >70): linear +                           |
| 76 | Bigaard, et al (2004)   | Diet, Cancer and Health study (1993-1997) | Denmark, n=51053 aged 50-64yrs                    | BIA (fat free mass index, body fat mass index)                                                                               | Modelled continuously using linear splines, and relative risks estimated per 10% increase in waist circumference and per kg/m <sup>2</sup> increase in body fat mass index and fat free mass index<br>Results stratified into high and low range corresponding to cut-offs at the 40 <sup>th</sup> and 60 <sup>th</sup> percentiles | All-cause mortality                         | Fat mass and mortality: J (men)<br>Fat mass and mortality: J (women)<br>Fat free mass and mortality: reverse J (men)<br>Fat free mass and mortality: reverse J (women)<br>WC and mortality: linear + (men)<br>WC and mortality: linear + (women) |
| 77 | Bigaard, et al. (2005)  | Diet, Cancer and Health (1993-1997)       | Denmark, n=57058 adults                           | BIA (body fat mass index, fat free mass index), waist circumference                                                          | Modelled continuously using linear splines                                                                                                                                                                                                                                                                                          | All-cause mortality                         | Body fat mass index and all-cause mortality: J (men)<br>Body fat mass index and all-cause mortality: J (women)<br>Fat free mass index and mortality: reverse J (men)<br>Fat free mass index and mortality: reverse J (women)                     |
| 78 | Boloukat, et al. (2018) | Tehran Lipid and Glucose Study            | Iran, n=4631 aged >40yrs                          | BMI, waist circumference, waist-to-height ratio, WHR                                                                         | Modelled continuously per 1 unit increase in each exposure                                                                                                                                                                                                                                                                          | CHD or stroke incidence                     | WC and CVD: 0 (men)<br>WC and CVD: 0 (women)<br>WHR and CVD: 0 (men)<br>WHR and CVD: 0 (women)<br>Waist-to-height ratio and CVD: 0 (men)<br>Waist-to-height ratio and CVD: 0 (women)                                                             |
| 43 | Brown, et al. (2016)    | NHANES (1988-1994)                        | USA, n=4425 aged >60 yrs                          | BIA (skeletal muscle index), gait speed                                                                                      | Sarcopenia defined as low gait speed (<0.8m/s) and SMI <10.76 (men), <6.75 (women)                                                                                                                                                                                                                                                  | All-cause and CVD mortality                 | Sarcopenia and mortality: + (men)<br>Sarcopenia and mortality: + (women)<br>Sarcopenia and CVD: 0 (men)<br>Sarcopenia and CVD: + (women)                                                                                                         |
| 79 | Brown, et al. (2017)    | NHANES III (1988-1994)                    | USA, n=1487 aged >65 yrs                          | BIA (Appendicular lean mass)                                                                                                 | Modelled continuously per 1 SD of ALM                                                                                                                                                                                                                                                                                               | All-cause mortality                         | Appendicular lean mass and mortality: - linear (men)<br>Appendicular lean mass and mortality: - linear (women)                                                                                                                                   |
| 44 | Cesari, et al (2009)    | InChianti study (1998-2000)               | Italy, n=934 aged >65yrs                          | Peripheral quantitative computerised tomography (muscle density, muscle area, fat area)                                      | Modelled continuously per 1 SD increase of each exposure                                                                                                                                                                                                                                                                            | All-cause mortality                         | Muscle area and mortality (men and women combined): 0<br>Fat area and mortality (men and women combined): 0                                                                                                                                      |
| 80 | Chen, et al. (2018)     | China Kadoorie Biobank (2004-2008)        | China, n=489301 aged 30-79yrs                     | BMI, body fat %, waist circumference                                                                                         | 7 groups for each exposure, and BMI per 5kg/m <sup>2</sup> , % body fat per 10%, waist circumference per 1 SD                                                                                                                                                                                                                       | Ischaemic and haemorrhagic stroke incidence | BMI and stroke/haemorrhage (men and women combined): + linear<br>WC and stroke/haemorrhage (men and women combined): + linear<br>Body fat % and stroke/haemorrhage (men and women combined): + linear                                            |
| 81 | Chen et al. (2019)      | Women's Health Initiative                 | USA, n=2,683 postmenopausal women with normal BMI | DEXA - % whole body and regional fat quartiles, fat mass index (dividing total or regional fat mass in kg by height squared) | Quartiles                                                                                                                                                                                                                                                                                                                           | CVD                                         | Whole body fat mass and mortality: 0 (women)<br>Leg fat and mortality: - (women)<br>trunk fat and mortality: + (women)                                                                                                                           |
| 82 | Cheung, et al. (2016)   | NHANES (1999-2004)                        | USA, n=2841 aged >65yrs                           | DEXA (Appendicular lean mass)                                                                                                | Calculated ALM, ALM/BMI, ALM/H <sup>2</sup> from DEXA. Sarcopenia defined using cut-points for each measure (given in their supplementary index).                                                                                                                                                                                   | All-cause mortality                         | Low appendicular lean mass and mortality: + (men and women combined)                                                                                                                                                                             |
| 83 | Chin, et al (2013)      | KNHANES (2008-2012)                       | South Korea, n=1578 aged >65yrs                   | DEXA (Appendicular skeletal muscle mass)                                                                                     | Sarcopenia defined as ASM/weight <1 SD below the gender-specific mean of a reference group aged 20-39 years. Equates to <32.2% men, <25.6% women.                                                                                                                                                                                   | CVD incidence                               | Sarcopenic and CVD (men and women combined): +                                                                                                                                                                                                   |

|    |                                    |                                                 |                                  |                                                                                                                         |                                                                                                                                                                                                            |                                    |                                                                                                                                                                                                                                                                                                                                                                                                                                                                                                                                                                                                                  |
|----|------------------------------------|-------------------------------------------------|----------------------------------|-------------------------------------------------------------------------------------------------------------------------|------------------------------------------------------------------------------------------------------------------------------------------------------------------------------------------------------------|------------------------------------|------------------------------------------------------------------------------------------------------------------------------------------------------------------------------------------------------------------------------------------------------------------------------------------------------------------------------------------------------------------------------------------------------------------------------------------------------------------------------------------------------------------------------------------------------------------------------------------------------------------|
|    |                                    |                                                 |                                  |                                                                                                                         | Sarcopenic obesity if both sarcopenic and obese BMI                                                                                                                                                        |                                    |                                                                                                                                                                                                                                                                                                                                                                                                                                                                                                                                                                                                                  |
| 84 | Chuang, et al. (2014)              | Elderly Nutrition and Health Survey (1999-2000) | Taiwan, n=1512 aged >65yrs       | BIA (skeletal muscle mass index), BMI, waist circumference                                                              | Low/high risk groups defined as ASMI <11.45kg/m <sup>2</sup> (men) 8.51kg/m <sup>2</sup> (women) based off quartiles                                                                                       | All-cause mortality                | Low skeletal muscle index and mortality: 0 (men)<br>Low skeletal muscle index and mortality: + (women)<br>Low skeletal muscle index and CVD: 0 (men)<br>Low skeletal muscle index and CVD: + (women)                                                                                                                                                                                                                                                                                                                                                                                                             |
| 85 | Chuang, et al. (2016)              | Elderly Nutrition and Health Survey             | Taiwan, n=1485 aged >65 yrs      | BIA (skeletal muscle mass index)                                                                                        | Sarcopenia defined as SMMI men <11.45, women <8.51 [14]<br>Sarcopenic obesity defined as being sarcopenic and having a high triglyceride (>150mg/dL) and high waist circumference (>90cm men, >80cm women) | All-cause and CVD mortality        | Abdominal obesity and mortality: 0 (men and women combined)<br>Abdominal obesity and CVD: 0 (men and women combined)<br>Sarcopenic and mortality: 0 (men and women combined)<br>Sarcopenic and CVD: 0 (men and women combined)<br>Sarcopenic obesity and mortality: + (men and women combined)<br>Sarcopenic obesity and CVD: + (men and women combined)                                                                                                                                                                                                                                                         |
| 86 | de Almeida Roediger, et al. (2019) | SABE (2000-2010)                                | Brazil, n=1504 aged >60yrs       | BMI, waist circumference, waist-to-hip ratio skinfold, mid-upper arm circumference, calf circumference, arm muscle area | All exposures analysed as binary variables as either high vs low or adequate vs inadequate.                                                                                                                | All-cause mortality                | WC and mortality: 0 (men and women combined)<br>WHR and mortality: 0 (men and women combined)<br>MAMC (muscle) and mortality: - (men and women combined)<br>Calf circumference (muscle) and mortality: - (men and women combined)                                                                                                                                                                                                                                                                                                                                                                                |
| 87 | de Santana et al. (2019)           | n/a                                             | Brazil, n=839 aged >=65yrs       | DEXA (total fat, appendicular lean mass)                                                                                | Low lean mass, presence of visceral adipose issue                                                                                                                                                          | CVD mortality, all cause mortality | Low muscle and CVD mortality: + (men and women combined)<br>Low muscle and mortality: + (men and women combined)<br>Fat mass and CVD mortality: + (men and women combined)<br>Fat mass and mortality: + (men and women combined)                                                                                                                                                                                                                                                                                                                                                                                 |
| 88 | Dolan, et al. (2007)               | Study of Osteoporotic Fractures                 | USA, n=8029 women aged >65       | BIA (lean mass, fat mass, % body fat), BMI, waist girth                                                                 | Quintiles of each exposure                                                                                                                                                                                 | All-cause mortality                | Fat mass and mortality (women): U<br>Lean mass and mortality (women): 0<br>BMI and mortality (women): U                                                                                                                                                                                                                                                                                                                                                                                                                                                                                                          |
| 89 | Dong et al (2018)                  | NHANES III (1988-1994)                          | USA, n=16415) aged 18-89yrs      | BIA (body fat %), WHR                                                                                                   | Body fat % and WHR modelled continuously using cubic splines at 4 knots.<br>Also created 9 groups to assess joint associations                                                                             | All-cause mortality                | Body fat % and mortality: U (men)<br>Body fat % and mortality : U (women)<br>WHR and mortality: U (men)<br>WHR and mortality: + linear (women)                                                                                                                                                                                                                                                                                                                                                                                                                                                                   |
| 90 | Gale, et al. (2007)                | n/a                                             | UK, n=800 aged >65yrs            | Skinfolds (fat mass, fat free mass), BMI, grip strength                                                                 | Modelled continuously per 1 SD increase in each exposure                                                                                                                                                   | All-cause and CVD mortality        | Body fat % and CVD: 0 (men)<br>Body fat % and CVD: 0 (women)<br>Body fat % and mortality: 0 (men)<br>Body fat % and mortality: 0 (women)<br>MAMC (muscle) and CVD: 0 (men)<br>MAMC (muscle) and CVD: 0 (women)<br>Fat free mass and CVD: 0 (men)<br>Fat free mass and CVD: 0 (women)<br>MAMC (muscle) and mortality: 0 (men)<br>MAMC (muscle) and mortality: 0 (women)<br>Fat free mass and mortality: 0 (men)<br>Fat free mass and mortality: 0 (women)<br>Grip strength and CVD: + (men)<br>Grip strength and CVD: 0 (women)<br>Grip strength and mortality: + (men)<br>Grip strength and mortality: 0 (women) |
| 91 | Gillum, et al. (2001)              | NHANES I (1992)                                 | USA, n=6936 aged 45-74yrs        | BMI, Subscapular skinfold (SSF), subscapular to triceps skinfold thickness ratio (SFR)                                  | Each exposure modelled in quartiles and results stratified by race, sex and smoking status                                                                                                                 | Stroke incidence                   | Trunk obesity and stroke: weak U (white men ex-smokers)<br>Trunk obesity and stroke: 0 (women)<br>Overall obesity and stroke: U (white men ex-smokers)<br>Overall obesity and stroke: 0 (women)                                                                                                                                                                                                                                                                                                                                                                                                                  |
| 92 | Gnatiuc et al. (2019)              | Mexico City cohort study                        | Mexico, n=159,755 aged 35 to <75 | BMI, waist-to-hip ratio, waist circumference                                                                            | Continuously                                                                                                                                                                                               | all-cause mortality                | BMI and mortality: J (men and women cobined)<br>WHR and mortality: + (men and women combined)                                                                                                                                                                                                                                                                                                                                                                                                                                                                                                                    |

|     |                           |                                                     |                                           |                                                                                                                               |                                                                                                                                                                                        |                                                         |                                                                                                                                                                                                                                                                                                                  |
|-----|---------------------------|-----------------------------------------------------|-------------------------------------------|-------------------------------------------------------------------------------------------------------------------------------|----------------------------------------------------------------------------------------------------------------------------------------------------------------------------------------|---------------------------------------------------------|------------------------------------------------------------------------------------------------------------------------------------------------------------------------------------------------------------------------------------------------------------------------------------------------------------------|
|     |                           |                                                     |                                           |                                                                                                                               |                                                                                                                                                                                        |                                                         | WC and mortality: + (men and women combined)                                                                                                                                                                                                                                                                     |
| 93  | Graf, et al. (2015)       | n/a                                                 | Switzerland, n=3181 aged >65yrs           | BIA (fat mass index, fat free mass index)                                                                                     | Quartiles of FMI and FFMI                                                                                                                                                              | All-cause mortality                                     | Fat free mass index and mortality: 0 (women)<br>Fat free mass index and mortality: - (men)<br>Fat mass index and mortality: 0 (men)<br>Fat mass index and mortality: 0 (women)                                                                                                                                   |
| 94  | Han, et al. (2010)        | Korean Longitudinal Study on Health and Aging       | South Korea, n=877 aged >65yrs            | BIA (lean mass, fat mass, fat percentage, lean mass index), BMI, waist circumference                                          | 3 groups for each exposure: <25 <sup>th</sup> percentile, 25-75 <sup>th</sup> percentile, >75 <sup>th</sup> percentile                                                                 | All-cause mortality                                     | Lean mass and mortality: - (men and women combined)<br>Fat mass and mortality: 0 (men and women combined)                                                                                                                                                                                                        |
| 95  | Heitmann, et al. (2000)   | n/a                                                 | Sweden, n=787 men aged 60yrs              | Whole body potassium counter (lean body mass and fat mass calculated)                                                         | Quintiles, fractional polynomials                                                                                                                                                      | All-cause mortality                                     | Fat free mass and mortality: reverse J (men)<br>Fat mass and mortality: J (men)<br>BMI and mortality: U (men)                                                                                                                                                                                                    |
| 96  | Hirani, et al. (2017)     | Concord Health and Aging in Men Project (2005-2013) | Australia, n=1666 men aged >70yrs         | DEXA (Appendicular lean mass, fat %)                                                                                          | Low lean mass defined as ALM:BMI ratio <0.789 [6], Obesity defined as fat % > 30% [7]. 4 groups created: neither obese nor low muscle, obese only, low muscle only, sarcopenic obesity | Frailty, disability, institutionalisation and mortality | Obesity and mortality (men): 0<br>Low muscle and mortality (men): 0<br>Sarcopenic obesity and mortality (men): 0                                                                                                                                                                                                 |
| 97  | Hotchkiss, et al. (2013)  | Scottish Health Survey                              | Scotland, n=9329 aged 18-86yrs            | BMI, Waist circumference, waist to hip ratio                                                                                  | Quartiles of WC and WHR. BMI groups (WHO classification)                                                                                                                               | All-cause mortality, CVD incidence and mortality        | Adiposity and incident CHD: + (men)<br>Adiposity and incident CHD: + (women)<br>Adiposity and mortality: + (men)<br>Adiposity and mortality: + (women)<br>Adiposity and CHD mortality: 0 (men)<br>Adiposity and CHD mortality: 0 (women)                                                                         |
| 98  | Howell, et al. (2018)     | NHANES III and NHANES (1999-2010)                   | USA, n=5849 Mexican Americans aged >20yrs | BIA (lean mass, fat mass, body fat %), waist circumference, waist-to-height ratio, skinfolds                                  | Modelled continuously: BMI per 5kg/m <sup>2</sup> , WC per 5cm, Waist to height ratio per 0.5, skinfolds per 5mm, % body fat per 5%, lean mass per 5kg, fat mass per 5kg               | All-cause and CVD mortality                             | Fat mass and CVD mortality: - (men)<br>Fat mass and CVD mortality: + (women)<br>Fat mass and mortality: 0 (men)<br>Fat mass and mortality: + (women)<br>Lean mass and CVD mortality: 0 (men)<br>Lean mass and CVD mortality: + (women)<br>Lean mass and mortality: 0 (men)<br>Lean mass and mortality: - (women) |
| 99  | Kahn, et al. (2012)       | NHANES III (1988-1994)                              | USA, n=11437 aged 18-64 yrs               | BMI, waist circumference, waist-to-hip ratio, waist-to-height ratio                                                           | Modelled continuously per 1 SD increase in each exposure and also in quartiles                                                                                                         | All-cause mortality                                     | BMI and CVD: J (men and women combined)<br>WC and CVD: + linear (men and women combined)<br>WHR and CVD: + linear (men and women combined)<br>Body fat % and CVD: + linear (men and women combined)                                                                                                              |
| 100 | Katzmarzyk, et al. (2002) | Canada Fitness Survey                               | Canada, n=10323 aged 20-69yrs             | Waist circumference, skinfolds principal component of skinfold residuals (indicates subcutaneous adipose tissue distribution) | Modelled each exposure continuously using polynomial models                                                                                                                            | All-cause mortality                                     | WC and all-cause mortality: + (men)<br>WC and all-cause mortality: + (women)<br>WHR and all-cause mortality: + (men)<br>WHR and all-cause mortality: + (women)<br>Waist-to-height ratio and all-cause mortality: + (men)<br>Waist-to-height ratio and all-cause mortality: + (women)                             |
| 101 | Kim, et al. (2017)        | UK Biobank (2006-2010)                              | UK, n=403199 aged 40-69 yrs               | Grip strength, BMI, waist circumference, % body fat                                                                           | Per 5kg increase in GS, quintiles of GS within BMI/%body fat/waist circumference categories                                                                                            | All-cause and CVD mortality                             | WC and all-cause mortality: J (men)<br>WC and all-cause mortality: linear + (women)<br>Skinfolds (adiposity) and mortality: J (men),<br>Skinfolds (adiposity) and mortality: linear + (women)<br>BMI and mortality: J (men)<br>BMI and mortality: linear + (women)                                               |
|     |                           |                                                     |                                           |                                                                                                                               |                                                                                                                                                                                        |                                                         | Grip strength and all-cause mortality: linear - (men)<br>Grip strength and all-cause mortality: linear - (women)<br>Grip strength and CVD mortality: linear - (men)<br>Grip strength and CVD mortality: linear - (women)                                                                                         |

|     |                        |                                                          |                                   |                                                                                                                                                                                                                |                                                                                                                                                                                                     |                                                                          |                                                                                                                                                                                                                                                                                                                                                                                                                                                                                                                                |
|-----|------------------------|----------------------------------------------------------|-----------------------------------|----------------------------------------------------------------------------------------------------------------------------------------------------------------------------------------------------------------|-----------------------------------------------------------------------------------------------------------------------------------------------------------------------------------------------------|--------------------------------------------------------------------------|--------------------------------------------------------------------------------------------------------------------------------------------------------------------------------------------------------------------------------------------------------------------------------------------------------------------------------------------------------------------------------------------------------------------------------------------------------------------------------------------------------------------------------|
| 102 | Kizer, et al. (2011)   | Cardiovascular Health Study                              | USA, n=3754 aged 65-100yrs        | BIA (fat free mass, fat mass) BMI, waist circumference, waist to hip ratio, waist to height ratio                                                                                                              | Quintiles                                                                                                                                                                                           | Ischemic stroke incidence, CHD                                           | Fat mass and stroke or CHD: 0 (men)<br>Fat mass and stroke or CHD: 0 (women)<br>Fat free mass and stroke or CHD: 0 (men)<br>Fat free mass and stroke or CHD: 0 (women)<br>WC and stroke: 0 (men)<br>WC and stroke: 0 (women)<br>WHR and stroke: 0<br>WC and CHD: +<br>WHR and CHD: +                                                                                                                                                                                                                                           |
| 103 | Kouviri et al. (2019)  | ATTICA and GRECS                                         | Greece, n=10428                   | Lean mass index and fat mass index created through total body lean and fat mass (indirectly calculated through population formals based on body weight, height, waist circumference) divided by height squared | Tertiles                                                                                                                                                                                            | CVD                                                                      | Fat mass and CVD: + (men)<br>Fat mass and CVD: + (women)<br>Lean mass and CVD: U (men)<br>Lean mass and CVD: U (women)                                                                                                                                                                                                                                                                                                                                                                                                         |
| 54  | Lee et al (2018)       | Health Professionals Follow-up Study (1987-2012)         | USA, n=38006 men aged 40-75 years | Derived predicted lean body mass and fat mass using equations developed by NHANES and based on age, race, height, weight, waist circumference                                                                  | Quintiles of predicted lean body mass and fat mass                                                                                                                                                  | All-cause and cause-specific (CVD, cancer, respiratory, other) mortality | BMI & all-cause mortality: J (men)<br>Fat mass & all-cause mortality: linear (men)<br>Lean mass & all-cause mortality: U (men)<br>Fat & CVD: linear (men)<br>Lean body mass & CVD: weak U (men)<br>BMI & CVD: U (men)                                                                                                                                                                                                                                                                                                          |
| 104 | Lee, et al. (2012)     | n/a                                                      | China, n=3978 aged >65yrs         | DEXA (body fat %), waist circumference, waist to hip ratio, relative abdominal fat (abdominal fat/whole body fat)                                                                                              | Quintiles                                                                                                                                                                                           | All-cause and CVD mortality                                              | All-cause mortality and % body fat: - (men)<br>All-cause mortality and % body fat: 0 (women)<br>All-cause mortality and waist circumference: 0 (men)<br>All-cause mortality and waist circumference: 0 (women)<br>All-cause mortality and WHR: 0 (men)<br>All-cause mortality and WHR: 0 (women)<br>CVD mortality and WC: 0 (men)<br>CVD mortality and WC: 0 (women)<br>CVD mortality and % body fat: 0 (men)<br>CVD mortality and % body fat: 0 (women)<br>CVD mortality and WHR: 0 (men)<br>CVD mortality and WHR: 0 (women) |
| 105 | Levitan, et al. (2009) | Swedish Mammography Cohort and the Cohort of Swedish Men | Sweden, n=80360 aged 45-79yrs     | BMI, waist circumference, waist to hip ratio, waist to height ratio                                                                                                                                            | Continuously (per 1 IQR increase in each exposure)                                                                                                                                                  | Heart failure hospitalisation or mortality                               | WC and CVD: linear + (men)<br>WC and CVD: linear + (women)<br>WHR and CVD: + (men)<br>WHR and CVD: 0 (women)<br>Waist-to-height ratio and CVD: + linear (men)<br>Waist-to-height ratio and CVD: + linear (women)                                                                                                                                                                                                                                                                                                               |
| 106 | Li, et al. (2018)      | NHANES (1999-2002)                                       | USA, n=4449 aged >50 yrs          | DEXA (Appendicular lean mass)                                                                                                                                                                                  | Low muscle mass defined as appendicular lean mass (ALM) <19.75kg (M) or <15.02kg (F) and ALM/BMI <0.512 (M) and <0.789kg (F). Based on FNISH Sarcopenia Project definition [1]. Low muscle strength | All-cause mortality                                                      | Low muscle alone and mortality: 0 (men and women combined)<br>Low muscle with low strength and mortality: + (men and women combined)                                                                                                                                                                                                                                                                                                                                                                                           |
| 107 | Myint, et al. (2014)   | EPIC-Norfolk (1997-2000)                                 | UK, n=15062 aged 40-79yrs         | BIA (body fat %)                                                                                                                                                                                               | Quartiles of body fat %                                                                                                                                                                             | All-cause mortality and CVD incidence                                    | Body fat % and mortality: 0 (men)<br>Body fat % and mortality: 0 (women)<br>Body fat % and CVD: 0 (men)<br>Body fat % and CVD: 0 (women)                                                                                                                                                                                                                                                                                                                                                                                       |



|     |                       |                                                     |                                         |                                                                                                                                 |                                                                                                                                                                                                                              |                                   |                                                                                                                                                                                                                                                                                                                                                                                                                                                                                                                                                                                                                                     |
|-----|-----------------------|-----------------------------------------------------|-----------------------------------------|---------------------------------------------------------------------------------------------------------------------------------|------------------------------------------------------------------------------------------------------------------------------------------------------------------------------------------------------------------------------|-----------------------------------|-------------------------------------------------------------------------------------------------------------------------------------------------------------------------------------------------------------------------------------------------------------------------------------------------------------------------------------------------------------------------------------------------------------------------------------------------------------------------------------------------------------------------------------------------------------------------------------------------------------------------------------|
| 108 | Nalini et al. (2019)  | Golestan Cohort Study                               | Iran, n=50,045 aged 40-75               | BMI, waist circumference, waist to hip ratio, waist to height ratio                                                             | Quintiles                                                                                                                                                                                                                    | All cause and CVD mortality       | BMI and all-cause mortality: 0 (men)<br>BMI and all-cause mortality: 0 (women)<br>BMI and CVD mortality: + (men)<br>BMI and CVD mortality: + (women)<br>Waist to height ratio and mortality: + (men)<br>Waist to height ratio and mortality: + (women)<br>Waist to height ratio and CVD mortality: + (men)<br>Waist to height ratio and CVD mortality: + (women)<br>WC and mortality: 0 (men)<br>WC and mortality 0 (women)<br>WC and CVD mortality: + (men)<br>WC and CVD mortality: + (women)<br>WHR and mortality: + (men)<br>WHR And mortality: + (women)<br>WHR and CVD mortality: + (men)<br>WHR and CVD mortality: + (women) |
| 109 | Newman, et al. (2006) | Health, Aging and Body Composition study            | USA, n=29292 aged 70-79yrs              | DEXA (leg and arm lean mass), CT scan (thigh muscle area), knee extension strength                                              | Per 1 SD increase                                                                                                                                                                                                            | All-cause mortality               | Arm or leg lean mass and mortality: 0 (men and women combined)<br>Grip strength and mortality: + (men and women combined)                                                                                                                                                                                                                                                                                                                                                                                                                                                                                                           |
| 110 | Ofstad et al (2019)   | HUNT 2                                              | Norway, n=61,016                        | BMI, WC, WHR, estimated total body fat (based on the YMCA's gender specific formulas), ABSI                                     | Quartiles                                                                                                                                                                                                                    | CVD mortality                     | Body fat (estimated) and CVD mortality: + (men)<br>Body fat (estimated) and CVD mortality: + (women)<br>WC and CVD mortality: + (men)<br>WC and CVD mortality: + (women)<br>BMI and CVD mortality: +                                                                                                                                                                                                                                                                                                                                                                                                                                |
| 48  | Ortega, et al. (2016) | Aerobics Centre Longitudinal Study (1979-2003)      | USA, n=60335 aged >20 years             | BMI, body fat % determined by hydrostatic weighing or skinfold measurements, fat mass index, fat free mass index, fat free mass | For each exposure: very low <5th percentile, low 5-15th percentile, middle 15th-85th percentile, high 85-95th percentile, very high >95th                                                                                    | CVD mortality                     | BMI and CVD: + linear (men and women combined)<br>Body fat % and CVD: J (men and women combined)<br>Fat mass index and CVD: J (men and women combined)<br>Fat free mass and CVD: 0 (men and women combined)<br>Fat free mass index and CVD: + (men and women combined)                                                                                                                                                                                                                                                                                                                                                              |
| 111 | Otsuka, et al (2018)  | Longitudinal Study of Aging (1997-2013)             | Japan, n=1978 aged 40-79 yrs            | DEXA (Appendicular lean mass excluding bones [4])                                                                               | ALM/leg length, ALM/height, ALM/height <sup>2</sup> , ALM/weight*100, ALM/BMI*10                                                                                                                                             | All-cause mortality or disability | Lean mass and mortality: 0 (men)<br>Lean mass and mortality: 0 (women)                                                                                                                                                                                                                                                                                                                                                                                                                                                                                                                                                              |
| 112 | Padwal, et al. (2016) | Population Health Research Data Repository          | Canada, n=54420 aged >40yrs (91% women) | DEXA (body fat %), BMI                                                                                                          | Quintiles of BMI and body fat %. Fully adjusted models included both BMI and body fat %                                                                                                                                      | All-cause mortality               | BMI and mortality: U (men)<br>BMI and mortality: U (women)<br>Body fat % and mortality: J (men)<br>Body fat % and mortality: reverse J (women)                                                                                                                                                                                                                                                                                                                                                                                                                                                                                      |
| 113 | Park, et al. (2014)   | KNHANES (2008-2012)                                 | South Korea, n=7208 aged >50yrs         | DEXA (ASM, SMI)                                                                                                                 | SMI normal >32% (men) >25.4% (women), class I sarcopenia 29-32% (men) 22.8-25.4% (women), class II sarcopenia <29% (men) <22.8% (women) - corresponded to 1 and 2 SDs below gender-specific means of younger population [18] | CVD incidence                     | Sarcopenia and CVD (men): +<br>Sarcopenia and CVD (women): 0                                                                                                                                                                                                                                                                                                                                                                                                                                                                                                                                                                        |
| 114 | Park, et al. (2018)   | Korean National Health Insurance Cohort (2008-2013) | South Korea, n=465,629 adults           | Weight-adjusted-waist index, waist circumference (WC), BMI, waist-to-height                                                     | 10 groups of each index                                                                                                                                                                                                      | All-cause and CVD mortality       | BMI and all-cause mortality: U (men and women combined)<br>WC and all-cause mortality: U (men and women combined)<br>WHR and all-cause mortality: U (men and women combined)                                                                                                                                                                                                                                                                                                                                                                                                                                                        |

|     |                          |                                         |                                  |                                                                          |                                                                                                                                                                                                                                                                                           |                                      |                                                                                                                                                                                                                                                                                                                                                                                                                                                                                        |
|-----|--------------------------|-----------------------------------------|----------------------------------|--------------------------------------------------------------------------|-------------------------------------------------------------------------------------------------------------------------------------------------------------------------------------------------------------------------------------------------------------------------------------------|--------------------------------------|----------------------------------------------------------------------------------------------------------------------------------------------------------------------------------------------------------------------------------------------------------------------------------------------------------------------------------------------------------------------------------------------------------------------------------------------------------------------------------------|
|     |                          |                                         |                                  | ratio (WHR), a body shape index (ABSI)                                   |                                                                                                                                                                                                                                                                                           |                                      | Weight-adjusted-waist index and all-cause mortality: U (men and women combined)<br>ABSI and all-cause mortality: U (men and women combined)<br>Weight-adjusted-waist index and CVD mortality: linear + (men and women combined)<br>A Body Shape Index and CVD mortality: linear + (men and women combined)<br>BMI and CVD: inverse J (men and women combined)<br>WC and CVD: inverse J (men and women combined)<br>WHR and CVD: inverse J (men and women combined)                     |
| 115 | Reis, et al. (2009)      | NHANES III (1988-1994)                  | USA, n=12,228 aged 30-102yrs     | Waist-to-thigh ratio, waist-to-hip ratio, waist circumference, BMI       | BMI categories, quintiles of WC, WHR and waist-to-thigh ratio                                                                                                                                                                                                                             | All-cause mortality                  | WHR and mortality: linear + (men)<br>WHR and mortality: 0 (women)<br>Waist-to-height ratio and mortality: + linear (men)<br>Waist-to-height ratio and mortality: + (women)<br>BMI and mortality: U (men)<br>BMI and mortality: U (women)<br>WC and mortality: J (women)<br>WC and mortality: J (men)                                                                                                                                                                                   |
| 116 | Reis, et al. (2009)      | NHANES III (1988-1994)                  | USA, n=5,780 aged 30-64yrs       | BMI, waist circumference, waist to hip ratio, waist to thigh ratio       | Quartiles of each exposure, results stratified by sex and race (white/black)                                                                                                                                                                                                              | All-cause mortality                  | BMI and all-cause mortality: 0 (men)<br>BMI and all-cause mortality: 0 (women)<br>WHR and all-cause mortality: linear + (women)<br>WHR and all-cause mortality: 0 (men)<br>Waist-to-thigh ratio and all-cause mortality: linear + (men)<br>Waist-to-thigh ratio and all-cause mortality: linear + (women)<br>WC and all-cause mortality: 0 (men)<br>WC and all-cause mortality: 0 (women)                                                                                              |
| 117 | Rexrode, et al. (2001)   | Physicians Health Study                 | USA, n=16,164 men aged 40-84yrs  | Waist circumference, waist to hip ratio, BMI                             | Quintiles of each exposure                                                                                                                                                                                                                                                                | CHD                                  | WC and CVD: linear + (men)<br>WHR and CVD: + linear (men)<br>BMI and CVD: + linear (men)                                                                                                                                                                                                                                                                                                                                                                                               |
| 118 | Sim et al (2019)         | Perth Longitudinal Study in Aging women | Australia, n=903 older women     | DEXA (appendicular lean mass), BMI, grip strength, timed up and go       | Various definitions of sarcopenia. Foundation of National Institutes of Health (FNIH), European Working Group on Sarcopenia in Older People (EWGSOP), and the adapted FNIH (AUS-POPF) using Australian population-specific cut points (<2 standard deviation below mean of young healthy) | All cause mortality                  | Lean mass and mortality: 0 (women)                                                                                                                                                                                                                                                                                                                                                                                                                                                     |
| 119 | Simpson, et al. (2007)   | Melbourne Collaborative Cohort Study    | Australia, n=41313 aged 27-75yrs | BIA (fat mass, body fat %), BMI, waist circumference, waist to hip ratio | Quintiles                                                                                                                                                                                                                                                                                 | All-cause mortality                  | BMI and all-cause mortality: U (men)<br>BMI and all-cause mortality: U (women)<br>WC and all-cause mortality: linear + (men)<br>WC and all-cause mortality: linear + (women)<br>WHR and all-cause mortality: linear + (men)<br>WHR and all-cause mortality: linear + (women)<br>Fat mass and all-cause mortality: linear + (men)<br>Fat mass and all-cause mortality: 0 (women)<br>Body fat % and all-cause mortality: linear + (men)<br>Body fat % and all-cause mortality: 0 (women) |
| 46  | Spahilari, et al. (2016) | Cardiovascular Health Study             | USA, n=1355 aged >65yrs          | DEXA (Total, appendicular lean and fat mass)                             | ALM, fat mass and lean principal components modelled linearly. Fat principal components modelled in quartiles                                                                                                                                                                             | All-cause, CVD and non-CVD mortality | Appendicular lean mass and CVD: linear - (men and women combined)<br>Appendicular lean mass and mortality: linear - (men and women combined)<br>Fat mass and CVD: linear - (men and women combined)<br>Fat mass and mortality: linear - (men and women combined)                                                                                                                                                                                                                       |

|     |                               |                                                |                                                |                                                                                                           |                                                                                                                                                                                                                                                                                    |                                                    |                                                                                                                                                                                                                                                                                 |
|-----|-------------------------------|------------------------------------------------|------------------------------------------------|-----------------------------------------------------------------------------------------------------------|------------------------------------------------------------------------------------------------------------------------------------------------------------------------------------------------------------------------------------------------------------------------------------|----------------------------------------------------|---------------------------------------------------------------------------------------------------------------------------------------------------------------------------------------------------------------------------------------------------------------------------------|
| 47  | Srikanthan, et al. (2014)     | NHANES III (1988-1994)                         | USA, n=3659 men aged >55 and women aged >65yrs | BIA (SMI), non-muscle index (BMI - SMI)                                                                   | Quartiles of SMI                                                                                                                                                                                                                                                                   | All-cause mortality                                | Skeletal muscle index and mortality: weak – (men and women combined)                                                                                                                                                                                                            |
| 120 | Srikanthan, et al. (2016)     | NHANES (1999-2004)                             | USA, n=6541 aged >20yrs                        | DEXA (Appendicular skeletal muscle mass index, trunk fat mass index)                                      | 4 groups: Low muscle/low fat (ASMI<median, TRFI<median), Low muscle/high fat (ASMI<median, TRFI>=median), High muscle/low fat (ASMI>=median, TRFI<median), high muscle. High fat (ASMI>=median, TRFI>=median)                                                                      | All-cause and CVD mortality                        | High muscle/low fat and CVD: - (men and women combined)<br>High muscle/low fat and mortality: - (men and women combined)<br>All other body composition groups and mortality: 0 (men and women combined)<br>All other body composition group and CVD: 0 (men and women combined) |
| 121 | Stefan, et al. (2008)         | Cooper Centre Longitudinal study (1970-2005)   | USA, n=11335 women                             | BMI, skinfolds (% body fat), waist circumference, waist to height ratio, waist to hip ratio               | Categorised as high or normal for each exposure. Cut-offs: Body fat 30%, Waist to hip ratio 0.75, waist to height ratio 0.5                                                                                                                                                        | All-cause mortality                                | Body fat % and all-cause mortality (women): 0<br>WC and all-cause mortality (women): 0<br>WHR and all-cause mortality (women): 0<br>Waist-to-height ratio and all-cause mortality (women): 0<br>BMI and all-cause mortality (women): 0                                          |
| 122 | Sui, et al. (2007)            | Aerobics Centre Longitudinal Study (1979-2001) | USA, n=2603 aged >60yrs                        | Hydrostatic weighing or skinfolds (% body fat, fat mass, fat free mass), waist circumference, BMI         | BMI categories, WC categorised as abdominal obese if >88cm (men) or >102cm (women), % Body fat % categorised as obese if >25% (men), >30% (women), quintiles of FFM                                                                                                                | All-cause mortality                                | WC and all-cause mortality: 0 (men and women combined)<br>Body fat % and all-cause mortality: 0 (men and women combined)<br>Fat free mass and all-cause mortality: + (men and women combined)                                                                                   |
| 123 | Tanne, et al. (2005)          | Israeli Ischemic Heart Disease project         | Israel, n=9151 men aged >23 ys                 | BMI, Subscapular skinfold (SSF), subscapular to triceps skinfold thickness ratio (SFR)                    | Exposures analysed per 1 SD increase                                                                                                                                                                                                                                               | Stroke and CHD mortality                           | Trunk obesity and CVD mortality (men): 0<br>Body fat distribution and CHD (men): + linear<br>Body fat distribution and stroke (men): 0                                                                                                                                          |
| 124 | The DECODE Study Group (2008) | DECODE study                                   | Europe, n=15521 aged 30-89yrs                  | Waist circumference                                                                                       | Abdominal obesity defined as waist circumference >94cm (men) or >80cm (women)                                                                                                                                                                                                      | CVD mortality                                      | WC and CVD mortality (men and women combined): 0                                                                                                                                                                                                                                |
| 125 | Thomson, et al. (2016)        | Women's Health Initiative Observational Study  | USA, n=77505 women                             | BMI, a body shape index, body adiposity index                                                             | Quintiles of ABSI and WC, BMI groups                                                                                                                                                                                                                                               | All-cause mortality                                | A Body Shape Index and CVD: linear + (women)<br>BMI and CVD: U (women)<br>Body adiposity index and CVD: U (women)                                                                                                                                                               |
| 126 | Toss, et al. (2012)           | n/a                                            | Sweden, n=921 aged >65yrs                      | DEXA (fat and lean mass)                                                                                  | Assessed continuously per kg                                                                                                                                                                                                                                                       | All-cause mortality                                | Lean mass and mortality: linear - (men)<br>Lean mass and mortality: linear - (women)<br>Fat mass and mortality: linear - (women)<br>Fat mass and mortality: 0 (men)                                                                                                             |
| 127 | Van Aller et al (2018)        | NHANES (1999-2004)                             | USA, n=3577 aged >=50yrs                       | DEXA                                                                                                      | Body composition phenotype (4 categories based on having low adiposity or high adiposity and low muscle mass or high muscle mass), Trunk FM/ASM ratio, Fat mass/fat free mass ratio. Then defined sarcopenic obese from cut-offs at various percentiles for each of these measures | All cause mortality                                | Sarcopenic obesity and mortality: + (men) aged 50 - 70 yr<br>Sarcopenic obesity and mortality: + (women) aged 50 - 70 yr<br>Sarcopenic obesity and mortality: 0 (men) aged > 70 yr<br>Sarcopenic obesity and mortality: 0 (women) aged >70 yr                                   |
| 128 | Wang, et al. (2013)           | Kailuan study                                  | China, n=94733 aged 18-98yrs                   | BMI, waist circumference, waist-to-hip ratio, waist-to-height ratio                                       | Quintiles                                                                                                                                                                                                                                                                          | Total stroke, ischemic stroke, haemorrhagic stroke | WC and total stroke: + linear (men and women combined)<br>WHR and total stroke: + linear (men and women combined)<br>Waist-to-height ratio and total stroke: + linear (men and women combined)                                                                                  |
| 129 | Wannamethee, et al. (2007)    | British Regional Heart Study (1998-2000)       | UK, n=4107 men aged 60-79                      | Mid-upper arm circumference, mid arm muscle circumference, BMI, BIA (Fat mass index, fat free mass index) | Quartiles of each exposure                                                                                                                                                                                                                                                         | All-cause mortality                                | Fat mass and mortality: 0 (men)<br>Fat free mass and mortality: 0 (men)<br>MAMC (muscle) and mortality: - linear (men)                                                                                                                                                          |

|     |                            |                                                           |                                                |                                                                |                                                                                                                                                                                                                                         |                             |                                                                                                                           |
|-----|----------------------------|-----------------------------------------------------------|------------------------------------------------|----------------------------------------------------------------|-----------------------------------------------------------------------------------------------------------------------------------------------------------------------------------------------------------------------------------------|-----------------------------|---------------------------------------------------------------------------------------------------------------------------|
| 130 | Wannamethee, et al. (2014) | British Regional Heart Study (1998-2000)                  | UK, n=4046 men aged 60-79yrs                   | Mid-upper arm circumference, mid arm muscle circumference, BMI | Tertiles of MAMC, and results stratified by prior CVD condition (none, coronary heart disease, heart failure)                                                                                                                           | All-cause mortality         | MAMC (muscle) and CHD (men): linear -<br>MAMC (muscle) and heart failure (men): 0                                         |
| 131 | Yang, et al. (2019)        | n/a                                                       | China, n=329 aged >=70yrs from 4 nursing homes | SARC-F and SARC-CalF questionnaires to screen for sarcopenia.  | Score of >= 4 (SARC-F) or >=11 (SARC-CalF) indicate sarcopenia                                                                                                                                                                          | All-cause mortality         | Sarcopenia and mortality: + (men and women combined)                                                                      |
| 132 | Yuki, et al. (2017)        | Longitudinal Study of Aging (1997-2013)                   | Japan, n=700 aged 65-79yrs                     | DEXA (skeletal muscle mass index), grip strength, gait speed   | Low muscle mass defined as SMI <7.0 (men), <5.4 (women) [15]. Low grip strength defined as <26kg (men) <18kg (women) [15]. Low gait speed defined as <0.8m/s [15]. Sarcopenia if low SMI and one of low grip strength or low gait speed | All-cause mortality         | Sarcopenia and mortality: + (men)<br>Sarcopenia and mortality: 0 (women)                                                  |
| 133 | Zaslavsky, et al. (2017)   | Women's Health Initiative Observational Study (1993-1998) | USA, n=876 frail women aged >65                | DEXA (Appendicular, central and total lean and fat mass)       | Quartiles of each measurement                                                                                                                                                                                                           | All-cause mortality         | Lean mass & mortality: 0 (women)<br>Fat mass & mortality: linear - (women)                                                |
| 134 | Zhang, et al. (2007)       | Shanghai Women's Health Study (1996-2000)                 | China, n=72773 women aged 40-70yrs             | Waist to hip ratio                                             | Quintiles                                                                                                                                                                                                                               | All-cause and CVD mortality | WHR and mortality: linear + (women)<br>WHR and CVD mortality: linear + (women)                                            |
| 135 | Zhu, et al. (2003)         | NHANES I & II                                             | USA, n=13369 women aged 25-75yrs               | Skinfolds (fat mass, fat free mass)                            | All exposures analysed as continuous                                                                                                                                                                                                    | All-cause mortality         | BMI and mortality (women): U<br>Fat free mass and mortality (women): linear -<br>Fat mass and mortality (women): linear - |
| 136 | Zong, et al. (2016)        | NHANES (1996-2006)                                        | USA, n=9471 aged >20yrs                        | DEXA (body fat % for whole-body, trunk, leg)                   | Quartiles of each measure of FM%                                                                                                                                                                                                        | All-cause and CVD mortality | Body fat % and CVD: U (men and women combined)<br>Body fat % and all-cause mortality: U (men and women combined)          |

Acronyms: ABSI: A body shape index; ASMI: Appendicular skeletal muscle mass index (appendicular skeletal muscle mass, kg/height<sup>2</sup>, m<sup>2</sup>); BAI: Body adiposity index; BIA: bioimpedance analysis; BFMI: Body fat mass index (= fat mass index); BMI: Body mass index (body mass, kg/ height<sup>2</sup>, m<sup>2</sup>); DEXA: Dual energy x-ray absorptiometry; FFM: Fat free mass; FFMI: Fat free mass index (fat free mass, kg/ height<sup>2</sup>, m<sup>2</sup>); FM: Fat mass; FMI: Fat mass index (fat mass, kg/ height<sup>2</sup>, m<sup>2</sup>); GS: Grip strength; KNHANES: Korea National Health and Nutrition Examination Survey; NHANES: National Health and Nutrition Examination Survey; SMI: Skeletal muscle mass index (Skeletal muscle mass of whole body, kg/height<sup>2</sup>, m<sup>2</sup>)

Table S3. Derivation of variables used in analysis from the UK Biobank questionnaire and interviews.

| Covariate                                     | Categories used in analysis                                                                                                                                                                                                                              | UK Biobank variable used (question ID) and source                                                                                                                                                                                                                                                                                                                                                                                                                                                                                                                                                                                                                                                                                                                                                                                                            |
|-----------------------------------------------|----------------------------------------------------------------------------------------------------------------------------------------------------------------------------------------------------------------------------------------------------------|--------------------------------------------------------------------------------------------------------------------------------------------------------------------------------------------------------------------------------------------------------------------------------------------------------------------------------------------------------------------------------------------------------------------------------------------------------------------------------------------------------------------------------------------------------------------------------------------------------------------------------------------------------------------------------------------------------------------------------------------------------------------------------------------------------------------------------------------------------------|
| <b>Body composition variables (exposures)</b> |                                                                                                                                                                                                                                                          |                                                                                                                                                                                                                                                                                                                                                                                                                                                                                                                                                                                                                                                                                                                                                                                                                                                              |
| Appendicular skeletal muscle mass (aSMM)      | Quintiles of the residuals from the model of aSMM regressed on height                                                                                                                                                                                    | Arm predicted mass (left) (UKBBID: 23126) <sup>‡</sup> , arm predicted mass (right) (UKBBID: 23122) <sup>‡</sup> , leg predicted mass (left) (UKBBID: 23118) <sup>‡</sup> , leg predicted mass (right) (UKBBID: 23114). Height (UKBBID: 12144) <sup>‡</sup> .                                                                                                                                                                                                                                                                                                                                                                                                                                                                                                                                                                                                |
| Fat mass (FM)                                 | Quintiles                                                                                                                                                                                                                                                | Whole body fat mass (UKBBID: 23100) <sup>‡</sup>                                                                                                                                                                                                                                                                                                                                                                                                                                                                                                                                                                                                                                                                                                                                                                                                             |
| Body composition groups                       | 1. Low aSMM / low FM<br>2. Low aSMM / moderate FM<br>3. Low aSMM / high FM<br>4. Moderate aSMM / low FM<br>5. Moderate aSMM / moderate FM<br>6. Moderate aSMM / high FM<br>7. High aSMM / low FM<br>8. High aSMM / moderate FM<br>9. High aSMM / high FM | Tertiles of aSMM within tertiles of FM derived from: arm predicted mass (left) (UKBBID: 23126) <sup>‡</sup> , arm predicted mass (right) (UKBBID: 23122) <sup>‡</sup> , leg predicted mass (left) (UKBBID: 23118) <sup>‡</sup> , leg predicted mass (right) (UKBBID: 23114), Whole body fat mass (UKBBID: 23100) <sup>‡</sup> , Height (UKBBID: 12144) <sup>‡</sup> .<br>Low aSMM, residuals of aSMM regressed on height: -10.82 - ≤ -0.97 (men), -5.88 - ≤ -0.57 (women)<br>Moderate aSMM: residuals of aSMM regressed on height: -0.97 - ≤ 0.85 (men), -0.57 - ≤ 0.45 (women)<br>High aSMM: residuals of aSMM regressed on height: 0.85 - ≤ 14.50 (men), 0.46 - ≤ 11.99 (women)<br>Low FM, kg: 5.0 - ≤ 18.1 (men), 5.0 - ≤ 21.4 (women)<br>Moderate FM: 18.2 - ≤ 24.1 (men), 21.5 - ≤ 28.8 (women)<br>High FM: 24.2 - ≤ 98.6 (men), 28.9 - ≤ 109.8 (women) |
| BMI                                           | Continuous (kg/m <sup>2</sup> )                                                                                                                                                                                                                          | Body mass index (UKBBID: 21001) <sup>‡</sup>                                                                                                                                                                                                                                                                                                                                                                                                                                                                                                                                                                                                                                                                                                                                                                                                                 |
| Waist circumference                           | Continuous (cm)                                                                                                                                                                                                                                          | Waist circumference (UKBBID: 48) <sup>‡</sup>                                                                                                                                                                                                                                                                                                                                                                                                                                                                                                                                                                                                                                                                                                                                                                                                                |
| Grip strength                                 | Continuous (kg)                                                                                                                                                                                                                                          | Hand grip strength (left) (UKBBID: 46) <sup>‡</sup> , Hand grip strength (right) (UKBBID: 47) <sup>‡</sup>                                                                                                                                                                                                                                                                                                                                                                                                                                                                                                                                                                                                                                                                                                                                                   |
| <b>Sociodemographic characteristics</b>       |                                                                                                                                                                                                                                                          |                                                                                                                                                                                                                                                                                                                                                                                                                                                                                                                                                                                                                                                                                                                                                                                                                                                              |
| Sex                                           | Men<br>Women                                                                                                                                                                                                                                             | Sex (UKBBID: 31) <sup>*</sup>                                                                                                                                                                                                                                                                                                                                                                                                                                                                                                                                                                                                                                                                                                                                                                                                                                |
| Education                                     | Higher degree (college or university degree, or professional qualifications)<br>Any school degree (A levels, AS levels, O levels, GCSEs or CSEs)<br>Vocational qualifications (NVQ, HND or HNC)<br>Other (none of the above qualifications)              | Qualifications (UKBBID: 6138) <sup>†</sup>                                                                                                                                                                                                                                                                                                                                                                                                                                                                                                                                                                                                                                                                                                                                                                                                                   |
| Townsend index                                | Quintiles (high index indicates most deprivation)                                                                                                                                                                                                        | Townsend index (UKBBID: 189) <sup>*</sup>                                                                                                                                                                                                                                                                                                                                                                                                                                                                                                                                                                                                                                                                                                                                                                                                                    |
| <b>Lifestyle factors</b>                      |                                                                                                                                                                                                                                                          |                                                                                                                                                                                                                                                                                                                                                                                                                                                                                                                                                                                                                                                                                                                                                                                                                                                              |
| Smoking status                                | Never<br>Current<br>Previous                                                                                                                                                                                                                             | Smoking status (UKBBID: 20116) <sup>†</sup>                                                                                                                                                                                                                                                                                                                                                                                                                                                                                                                                                                                                                                                                                                                                                                                                                  |
| Alcohol intake                                | None<br>Occasional (<1 unit/week)<br>Moderate (1-14 units/week)<br>Heavy (>14 units/week)                                                                                                                                                                | Alcohol intake frequency (UKBBID: 1558) <sup>†</sup><br>Depending on the participants' response, they were asked how much they consumed per week or month of the following alcoholic drinks:                                                                                                                                                                                                                                                                                                                                                                                                                                                                                                                                                                                                                                                                 |

|                                     |                                                                                                              |                                                                                                                                                                                                                                                                                                                                                                                                                                                                                                                                   |
|-------------------------------------|--------------------------------------------------------------------------------------------------------------|-----------------------------------------------------------------------------------------------------------------------------------------------------------------------------------------------------------------------------------------------------------------------------------------------------------------------------------------------------------------------------------------------------------------------------------------------------------------------------------------------------------------------------------|
|                                     |                                                                                                              | Red wine (UKBBID: 4407, 1568) <sup>†</sup> ; champagne and white wine (UKBBID: 4418, 1578) <sup>†</sup> ; beer and cider (UKBBID: 4429, 1588) <sup>†</sup> ; spirits (UKBBID: 4440, 1598) <sup>†</sup> ; fortified wine (UKBBID: 4451, 1608) <sup>†</sup> ; other (UKBBID: 4462, 5364) <sup>†</sup> .                                                                                                                                                                                                                             |
| Saturated fat score                 | None<br>Low<br>Medium<br>High<br>Unknown                                                                     | Beef intake (UKBBID: 1369) <sup>†</sup> , cheese intake (UKBBID: 1408) <sup>†</sup> , pork intake (UKBBID: 1389) <sup>†</sup> , lamb intake (UKBBID: 1379) <sup>†</sup> , processed meat intake (UKBBID: 1349), spread type (UKBBID: 1428) <sup>†</sup><br>The amount of each food eaten per week was totalled, then split into groups based off tertiles (with 'none' subsequently separated from the low category).                                                                                                             |
| Fruit and vegetable score           | None<br>Low<br>Medium<br>High<br>Unknown                                                                     | Fresh fruit intake (UKBBID: 1309) <sup>†</sup> , raw vegetable intake (UKBBID: 1299) <sup>†</sup> , cooked vegetable intake (UKBBID: 1289).<br>The amount of each food eaten per week was totalled, then split into groups based off tertiles (with 'none' subsequently separated from the low category).                                                                                                                                                                                                                         |
| Oily fish score                     | Unknown<br>None<br>Low<br>Medium<br>High                                                                     | Oily fish intake (UKBBID: 1329) <sup>†</sup><br>The amount of oily fish per week was split into groups based off tertiles (with 'none' subsequently separated from the low category).                                                                                                                                                                                                                                                                                                                                             |
| Physical activity (IPAQ MET scores) | Low<br>Moderate<br>High                                                                                      | Number of days/week of vigorous physical activity 10+ minutes (UKBBID: 904) <sup>†</sup> ; Duration of vigorous activity (UKBBID: 914) <sup>†</sup><br>Number of days/week of moderate physical activity 10+ minutes (UKBBID: 884) <sup>†</sup> ; Duration of moderate activity (UKBBID: 894) <sup>†</sup><br>Number of days/week walked 10+ minutes (UKBBID: 864) <sup>†</sup> ; Duration of walks (UKBBID: 874) <sup>†</sup>                                                                                                    |
| <b>Medical history</b>              |                                                                                                              |                                                                                                                                                                                                                                                                                                                                                                                                                                                                                                                                   |
| Type 2 diabetes                     | No<br>Yes (if diagnosed by doctor or taking insulin for diabetes)                                            | Diabetes diagnosed by doctor (UKBBID: 2443) <sup>†</sup><br>Medication for cholesterol, blood pressure or diabetes (men) (UKBBID: 6177) <sup>†</sup> ; Medication for cholesterol, blood pressure, diabetes, or take exogenous hormones (women) (UKBBID: 6153) <sup>†</sup>                                                                                                                                                                                                                                                       |
| Hypertension                        | No<br>Yes (if diagnosed by doctor, had an SBP >140mmHg, DBP >90mmHg or taking medication for blood pressure) | Vascular/heart problems diagnosed by doctor (high blood pressure is one response) (UKBBID: 6150) <sup>†</sup><br>Systolic blood pressure, automated reading / manual reading (UKBBID: 4080 / 93) <sup>†</sup><br>Diastolic blood pressure, automated reading / manual reading (UKBBID: 4079 / 94) <sup>†</sup><br>Medication for cholesterol, blood pressure or diabetes (men) (UKBBID: 6177) <sup>†</sup> ; Medication for cholesterol, blood pressure, diabetes, or take exogenous hormones (women) (UKBBID: 6153) <sup>†</sup> |
| Cholesterol                         | No<br>Yes (if taking cholesterol-lowering medication)                                                        | Medication for cholesterol, blood pressure or diabetes (men) (UKBBID: 6177) <sup>†</sup> ; Medication for cholesterol, blood pressure, diabetes, or take exogenous hormones (women) (UKBBID: 6153) <sup>†</sup> ; blood lipids (UKBBID: 30690,30760,30870)                                                                                                                                                                                                                                                                        |
| Prior cancer                        | No<br>Yes (if cancer had been previously diagnosed by a doctor)                                              | Cancer diagnosed by doctor (UKBBID: 2453) <sup>†</sup>                                                                                                                                                                                                                                                                                                                                                                                                                                                                            |
| Menopause                           | No<br>Yes (if responded to questions saying they have experienced the menopause)                             | Had menopause (women only) (UKBBID 2724) <sup>†</sup>                                                                                                                                                                                                                                                                                                                                                                                                                                                                             |
| *Recruitment questions              |                                                                                                              |                                                                                                                                                                                                                                                                                                                                                                                                                                                                                                                                   |
| <sup>†</sup> Touchscreen questions  |                                                                                                              |                                                                                                                                                                                                                                                                                                                                                                                                                                                                                                                                   |
| <sup>‡</sup> Physical measurements  |                                                                                                              |                                                                                                                                                                                                                                                                                                                                                                                                                                                                                                                                   |

Table S4. Baseline characteristics of the study population according to appendicular skeletal muscle mass and fat mass quintiles.

|                                       | Men appendicular skeletal muscle mass (aSMM) quintiles, range (kg)   |               |               |               |               | Men fat mass (FM) quintiles, range (kg)   |               |               |               |                | Total         |
|---------------------------------------|----------------------------------------------------------------------|---------------|---------------|---------------|---------------|-------------------------------------------|---------------|---------------|---------------|----------------|---------------|
|                                       | 13.5 - ≤ 24.0                                                        | 24.1 - ≤ 26.0 | 26.1 - ≤ 27.6 | 27.7 - ≤ 30.0 | 30.1 - ≤ 54.5 | 5.0 - ≤ 15.7                              | 15.8 - ≤ 19.4 | 19.5 - ≤ 22.9 | 23.0 - ≤ 27.5 | 27.6 - ≤ 98.6  |               |
| Age at recruitment, mean (SD)         | 61.0 (6.4)                                                           | 58.2 (7.4)    | 56.0 (7.8)    | 54.0 (7.9)    | 51.7 (7.8)    | 54.9 (8.3)                                | 56.0 (8.2)    | 56.5 (8.1)    | 56.7 (8.0)    | 56.9 (7.8)     | 56.2 (8.1)    |
| aSMM (kg), mean (SD)                  | 24.6 (2.9)                                                           | 25.9 (2.8)    | 26.9 (2.9)    | 28.1 (3.0)    | 30.5 (3.6)    | 24.6 (2.7)                                | 25.7 (2.7)    | 26.7 (2.7)    | 28.0 (2.8)    | 31.0 (3.6)     | 27.2 (3.7)    |
| FM (kg), mean (SD)                    | 22.4 (7.1)                                                           | 21.6 (7.2)    | 21.4 (7.4)    | 21.5 (7.8)    | 22.2 (9.2)    | 12.4 (2.4)                                | 17.5 (1.1)    | 21.0 (1.0)    | 24.9 (1.3)    | 33.6 (6.2)     | 21.8 (7.8)    |
| Body mass index (BMI), mean (SD)      | 26.0 (3.5)                                                           | 26.8 (3.5)    | 27.4 (3.6)    | 28.2 (3.8)    | 29.7 (4.4)    | 23.3 (1.8)                                | 25.6 (1.6)    | 27.1 (1.6)    | 29.0 (1.8)    | 33.1 (3.5)     | 27.6 (4.0)    |
| Weight (kg), mean (SD)                | 81.1 (12.1)                                                          | 83.0 (12.1)   | 84.9 (12.4)   | 87.3 (13.0)   | 92.6 (15.1)   | 71.7 (7.0)                                | 78.7 (6.3)    | 84.0 (6.2)    | 90.3 (6.5)    | 104.3 (11.8)   | 85.8 (13.6)   |
| Height (cm), mean (SD)                | 176.6 (6.7)                                                          | 175.9 (6.7)   | 175.8 (6.7)   | 176.0 (6.7)   | 176.6 (6.7)   | 175.3 (6.8)                               | 175.5 (6.6)   | 176.0 (6.5)   | 176.6 (6.6)   | 177.6 (6.7)    | 176.2 (6.7)   |
| Higher education, n (%)               | 12740 (39.7)                                                         | 13085 (40.7)  | 13140 (40.9)  | 13096 (40.7)  | 12645 (39.3)  | 13909 (43.1)                              | 13669 (42.1)  | 12987 (40.6)  | 12406 (38.8)  | 11735 (36.7)   | 64706 (40.2)  |
| Current smokers, n (%)                | 3714 (11.6)                                                          | 3431 (10.7)   | 3573 (11.1)   | 3563 (11.1)   | 3724 (11.6)   | 4366 (13.5)                               | 3600 (11.1)   | 3368 (10.5)   | 3385 (10.6)   | 3286 (10.3)    | 18005 (11.2)  |
| Low fruit and vegetable intake, n (%) | 14779 (46.0)                                                         | 14122 (43.9)  | 13977 (43.5)  | 13996 (43.5)  | 13367 (41.6)  | 13624 (42.2)                              | 13909 (42.8)  | 14191 (44.3)  | 14168 (44.3)  | 14349 (44.8)   | 70241 (43.7)  |
| High saturated intake, n (%)          | 11706 (36.4)                                                         | 11786 (36.6)  | 11647 (36.2)  | 11637 (36.2)  | 11778 (36.6)  | 10457 (32.4)                              | 11354 (34.9)  | 11699 (36.6)  | 12111 (37.9)  | 12933 (40.4)   | 58554 (36.4)  |
| Low oily fish intake, n (%)           | 10919 (34.0)                                                         | 11292 (35.1)  | 11342 (35.3)  | 11807 (36.7)  | 11988 (37.3)  | 11197 (34.7)                              | 11452 (35.2)  | 11518 (36.0)  | 11520 (36.0)  | 11661 (36.4)   | 57348 (35.7)  |
| Heavy drinkers, n (%)                 | 19948 (62.1)                                                         | 19885 (61.8)  | 19841 (61.7)  | 19608 (61.0)  | 18666 (58.1)  | 17562 (54.4)                              | 19859 (61.1)  | 20297 (63.4)  | 20535 (64.2)  | 19695 (61.5)   | 97948 (60.9)  |
| Low physical activity, n (%)          | 7247 (22.6)                                                          | 6670 (20.7)   | 6300 (19.6)   | 5901 (18.3)   | 5518 (17.2)   | 4580 (14.2)                               | 5351 (16.5)   | 6030 (18.8)   | 6918 (21.6)   | 8757 (27.4)    | 31636 (19.7)  |
| Hypertension, n (%)                   | 20146 (62.7)                                                         | 18878 (58.7)  | 18102 (56.3)  | 17362 (54.0)  | 17370 (54.0)  | 12683 (39.3)                              | 16508 (50.8)  | 18523 (57.9)  | 20600 (64.4)  | 23544 (73.5)   | 91858 (57.1)  |
| Type 2 diabetes, n (%)                | 1300 (4.1)                                                           | 1250 (3.9)    | 1156 (3.6)    | 1191 (3.7)    | 1408 (4.4)    | 388 (1.2)                                 | 666 (2.1)     | 906 (2.8)     | 1462 (4.6)    | 2883 (9.0)     | 6305 (3.9)    |
| Cancer history (>5 years ago), n (%)  | 1176 (3.7)                                                           | 927 (2.9)     | 816 (2.5)     | 662 (2.1)     | 652 (2.0)     | 780 (2.4)                                 | 836 (2.6)     | 856 (2.7)     | 872 (2.7)     | 889 (2.8)      | 4233 (2.6)    |
| Cholesterol medication, n (%)         | 6204 (19.5)                                                          | 5171 (16.2)   | 4646 (14.6)   | 4145 (13.0)   | 3842 (12.0)   | 2175 (6.8)                                | 3807 (11.8)   | 4664 (14.7)   | 5922 (18.6)   | 7440 (23.4)    | 24008 (15.0)  |
|                                       | Women appendicular skeletal muscle mass (aSMM) quintiles, range (kg) |               |               |               |               | Women fat mass (FM) quintiles, range (kg) |               |               |               |                | Total         |
|                                       | 10.3 - ≤ 16.5                                                        | 16.6 - ≤ 17.5 | 17.6 - ≤ 18.6 | 18.6 - ≤ 19.9 | 20.0 - ≤ 39.2 | 5.0 - ≤ 18.5                              | 18.6 - ≤ 22.8 | 22.9 - ≤ 27.1 | 27.2 - ≤ 33.3 | 33.4 - ≤ 109.8 |               |
| Age at recruitment, mean (SD)         | 58.9 (7.0)                                                           | 57.1 (7.6)    | 55.8 (7.9)    | 54.6 (8.0)    | 53.2 (8.1)    | 54.1 (8.1)                                | 55.7 (8.0)    | 56.6 (7.9)    | 57.0 (7.7)    | 56.4 (7.8)     | 55.9 (8.0)    |
| aSMM (kg), mean (SD)                  | 17.0 (1.7)                                                           | 17.5 (1.7)    | 18.0 (1.8)    | 18.7 (1.9)    | 20.3 (2.5)    | 16.6 (1.5)                                | 17.3 (1.4)    | 17.9 (1.4)    | 18.8 (1.5)    | 21.1 (2.3)     | 18.3 (2.3)    |
| FM (kg), mean (SD)                    | 27.7 (8.5)                                                           | 26.0 (8.4)    | 25.5 (8.8)    | 25.3 (9.5)    | 27.0 (11.9)   | 15.2 (2.6)                                | 20.7 (1.2)    | 24.9 (1.3)    | 29.9 (1.7)    | 41.1 (7.4)     | 26.3 (9.6)    |
| Body mass index (BMI), mean (SD)      | 25.9 (4.2)                                                           | 26.0 (4.2)    | 26.3 (4.4)    | 26.8 (4.8)    | 28.5 (6.0)    | 21.6 (1.7)                                | 24.0 (1.5)    | 25.9 (1.7)    | 28.3 (2.0)    | 33.9 (4.3)     | 26.7 (4.9)    |
| Weight (kg), mean (SD)                | 69.1 (11.6)                                                          | 68.8 (11.6)   | 69.4 (12.1)   | 70.8 (12.9)   | 75.9 (16.3)   | 56.4 (4.7)                                | 63.2 (3.7)    | 68.5 (3.7)    | 75.3 (4.2)    | 90.9 (11.1)    | 70.8 (13.3)   |
| Height (cm), mean (SD)                | 163.4 (6.2)                                                          | 162.6 (6.1)   | 162.5 (6.2)   | 162.6 (6.2)   | 163.3 (6.2)   | 161.6 (6.1)                               | 162.5 (6.1)   | 162.9 (6.1)   | 163.3 (6.1)   | 164.0 (6.2)    | 162.9 (6.2)   |
| Higher education, n (%)               | 14330 (36.6)                                                         | 15246 (38.9)  | 16033 (40.9)  | 16513 (42.2)  | 17056 (43.6)  | 18112 (45.5)                              | 16503 (42.6)  | 15834 (39.8)  | 14520 (37.7)  | 14209 (36.4)   | 79178 (40.4)  |
| Current smokers, n (%)                | 3039 (7.8)                                                           | 3164 (8.1)    | 3231 (8.2)    | 3258 (8.3)    | 3377 (8.6)    | 3792 (9.5)                                | 3166 (8.2)    | 3151 (7.9)    | 3062 (8.0)    | 2898 (7.4)     | 16069 (8.2)   |
| Low fruit and vegetable intake, n (%) | 12608 (32.2)                                                         | 12333 (31.5)  | 11874 (30.3)  | 11521 (29.4)  | 10910 (27.9)  | 12125 (30.5)                              | 11518 (29.7)  | 11756 (29.6)  | 11613 (30.2)  | 12234 (31.3)   | 59246 (30.3)  |
| High saturated intake, n (%)          | 11699 (29.9)                                                         | 11407 (29.1)  | 11252 (28.7)  | 11485 (29.3)  | 11212 (28.6)  | 10415 (26.2)                              | 10824 (27.9)  | 11615 (29.2)  | 11762 (30.6)  | 12439 (31.9)   | 57055 (29.1)  |
| Low oily fish intake, n (%)           | 12200 (31.2)                                                         | 12678 (32.4)  | 12619 (32.2)  | 13034 (33.3)  | 13137 (33.6)  | 12971 (32.6)                              | 12521 (32.3)  | 12669 (31.8)  | 12425 (32.3)  | 13082 (33.5)   | 63668 (32.5)  |
| Heavy drinkers, n (%)                 | 12955 (33.1)                                                         | 12840 (32.8)  | 13025 (33.2)  | 13134 (33.5)  | 12318 (31.5)  | 13562 (34.1)                              | 13654 (35.2)  | 13525 (34.0)  | 12561 (32.6)  | 10970 (28.1)   | 64272 (32.8)  |
| Low physical activity, n (%)          | 10117 (25.8)                                                         | 8974 (22.9)   | 8431 (21.5)   | 7986 (20.4)   | 7837 (20.0)   | 6398 (16.1)                               | 7114 (18.4)   | 8288 (20.8)   | 9385 (24.4)   | 12160 (31.1)   | 43345 (22.1)  |
| Hypertension, n (%)                   | 19371 (49.5)                                                         | 17669 (45.1)  | 16440 (42.0)  | 15877 (40.5)  | 16330 (41.7)  | 11345 (28.5)                              | 14192 (36.6)  | 17091 (43.0)  | 19293 (50.1)  | 23766 (60.9)   | 85687 (43.8)  |
| Type 2 diabetes, n (%)                | 635 (1.6)                                                            | 673 (1.7)     | 669 (1.7)     | 805 (2.1)     | 1250 (3.2)    | 239 (0.6)                                 | 363 (0.9)     | 524 (1.3)     | 860 (2.2)     | 2046 (5.3)     | 4032 (2.1)    |
| Cancer history (>5 years ago), n (%)  | 2540 (6.5)                                                           | 2298 (5.9)    | 2010 (5.1)    | 1933 (4.9)    | 1845 (4.7)    | 1912 (4.8)                                | 2052 (5.3)    | 2278 (5.7)    | 2214 (5.8)    | 2170 (5.6)     | 10626 (5.4)   |
| Cholesterol medication, n (%)         | 4294 (11.0)                                                          | 3605 (9.3)    | 3163 (8.1)    | 3015 (7.8)    | 3080 (7.9)    | 1536 (3.9)                                | 2350 (6.1)    | 3349 (8.5)    | 4201 (11.0)   | 5721 (14.8)    | 17157 (8.8)   |
| Post-menopausal, n (%)                | 28352 (72.4)                                                         | 25700 (65.6)  | 23352 (59.6)  | 21067 (53.8)  | 17594 (44.9)  | 21266 (53.5)                              | 22970 (59.3)  | 24686 (62.1)  | 24170 (62.8)  | 22973 (58.8)   | 116065 (59.3) |

$\chi^2$  test for trend:  $p < 0.05$  for all characteristics across the aSMM and FM quintiles. All characteristics were determined at the baseline assessment clinic through touch-screen questionnaires, interviews and/or physical measurements. Higher education: college or university degree or professional qualifications. Low physical activity:  $< 600$  metabolic equivalent (MET)-minutes per week<sup>32</sup>. Heavy alcohol drinker:  $> 14$  units of alcohol a week<sup>137</sup>. Hypertension: systolic blood pressure  $> 140$ mmHg, diastolic blood pressure  $> 90$ mmHg, was diagnosed by a doctor or were taking medication to lower blood pressure. Diabetes and cholesterol: taking medication for these conditions or diagnosed by a doctor. Cancer history: diagnosed with cancer  $> 5$  years ago (those with more recent cancer had been excluded). Low fruit and vegetable intake: the lowest consumption tertile ( $< 21$  portions per week). High saturated fat: the highest saturated fat tertile, based off portions per week of beef, lamb, pork and whether they consumed animal or plant-based spreads. Low oily fish: lowest consumption tertile ( $< 1$  portion per week).

Table S5. Baseline characteristics of the study population according to body composition groups.

| Men                                              | Low Muscle / | Med Muscle / | High Muscle / | Low Muscle / | Med Muscle / | High Muscle / | Low Muscle / | Med Muscle / | High Muscle / |
|--------------------------------------------------|--------------|--------------|---------------|--------------|--------------|---------------|--------------|--------------|---------------|
|                                                  | Low Fat      | Low Fat      | Low Fat       | Med Fat      | Med Fat      | Med Fat       | High Fat     | High Fat     | High Fat      |
| Age at recruitment, mean (SD)                    | 59.0 (7.3)   | 55.1 (8.0)   | 51.7 (8.0)    | 60.3 (6.7)   | 56.3 (7.7)   | 52.6 (8.0)    | 60.7 (6.5)   | 56.7 (7.6)   | 53.2 (7.8)    |
| Appendicular skeletal muscle (kg), mean (SD)     | 22.9 (2.1)   | 24.9 (1.9)   | 27.1 (2.3)    | 24.5 (1.9)   | 26.6 (1.8)   | 29.1 (2.2)    | 27.3 (2.6)   | 29.6 (2.5)   | 32.7 (3.3)    |
| Fat mass (kg), mean (SD)                         | 14.6 (2.8)   | 14.3 (2.8)   | 13.8 (3.1)    | 21.0 (1.7)   | 21.0 (1.7)   | 21.0 (1.7)    | 29.8 (5.5)   | 30.0 (5.8)   | 31.3 (7.2)    |
| Body mass index (BMI), mean (SD)                 | 22.8 (1.6)   | 24.1 (1.6)   | 25.4 (1.8)    | 25.7 (1.3)   | 27.2 (1.2)   | 28.6 (1.4)    | 29.7 (2.8)   | 31.4 (2.9)   | 33.5 (3.6)    |
| Weight, mean (SD)                                | 70.3 (6.3)   | 74.0 (6.3)   | 78.3 (7.0)    | 79.7 (5.3)   | 83.8 (5.1)   | 88.8 (5.9)    | 93.6 (9.7)   | 98.4 (10.0)  | 105.4 (12.3)  |
| Height, mean (SD)                                | 175.4 (6.8)  | 175.1 (6.7)  | 175.5 (6.7)   | 176.1 (6.6)  | 175.7 (6.5)  | 176.2 (6.6)   | 177.4 (6.6)  | 177.0 (6.6)  | 177.3 (6.7)   |
| Higher education, n (%)                          | 7753 (42.8)  | 7814 (43.2)  | 7626 (42.1)   | 7240 (41.0)  | 7309 (41.3)  | 6949 (39.3)   | 6488 (36.4)  | 6760 (37.9)  | 6767 (38.0)   |
| Current smokers, n (%)                           | 2406 (13.3)  | 2139 (11.8)  | 2285 (12.6)   | 1850 (10.5)  | 1882 (10.6)  | 1951 (11.0)   | 1768 (9.9)   | 1823 (10.2)  | 1901 (10.7)   |
| Low fruit and vegetable intake, n (%)            | 8143 (45.0)  | 7708 (42.6)  | 7199 (39.8)   | 7903 (44.7)  | 7827 (44.3)  | 7593 (42.9)   | 8095 (45.5)  | 7900 (44.3)  | 7873 (44.2)   |
| High saturated intake, n (%)                     | 6078 (33.6)  | 6014 (33.2)  | 6006 (33.2)   | 6423 (36.4)  | 6406 (36.2)  | 6510 (36.8)   | 6978 (39.2)  | 7064 (39.6)  | 7075 (39.7)   |
| Low oily fish intake, n (%)                      | 6141 (33.9)  | 6302 (34.8)  | 6510 (36.0)   | 5948 (33.7)  | 6296 (35.6)  | 6698 (37.9)   | 6280 (35.3)  | 6539 (36.7)  | 6634 (37.2)   |
| Heavy drinkers, n (%)                            | 10276 (56.8) | 10373 (57.3) | 10233 (56.5)  | 11242 (63.6) | 11271 (63.7) | 10997 (62.2)  | 11508 (64.7) | 11370 (63.8) | 10498 (58.9)  |
| Low physical activity, n (%)                     | 3250 (18.0)  | 2669 (14.7)  | 2204 (12.2)   | 3657 (20.7)  | 3413 (19.3)  | 2993 (16.9)   | 4695 (26.4)  | 4475 (25.1)  | 4280 (24.0)   |
| Hypertension, n (%)                              | 8641 (47.7)  | 7727 (42.7)  | 7208 (39.8)   | 10898 (61.7) | 10187 (57.6) | 9600 (54.3)   | 12947 (72.7) | 12437 (69.8) | 12213 (68.6)  |
| Diabetes, n (%)                                  | 298 (1.6)    | 245 (1.4)    | 274 (1.5)     | 558 (3.2)    | 505 (2.9)    | 500 (2.8)     | 1233 (6.9)   | 1245 (7.0)   | 1447 (8.2)    |
| Cholesterol medication, n (%)                    | 1930 (10.7)  | 1505 (8.4)   | 1195 (6.7)    | 3179 (18.1)  | 2527 (14.4)  | 2093 (11.9)   | 4515 (25.5)  | 3723 (21.0)  | 3341 (18.9)   |
| Cancer diagnosed by doctor (>5 years ago), n (%) | 573 (3.2)    | 407 (2.3)    | 373 (2.1)     | 591 (3.3)    | 480 (2.7)    | 340 (1.9)     | 651 (3.7)    | 468 (2.6)    | 350 (2.0)     |
| Women                                            | Low Muscle / | Med Muscle / | High Muscle / | Low Muscle / | Med Muscle / | High Muscle / | Low Muscle / | Med Muscle / | High Muscle / |
|                                                  | Low Fat      | Low Fat      | Low Fat       | Med Fat      | Med Fat      | Med Fat       | High Fat     | High Fat     | High Fat      |
| Age at recruitment, mean (SD)                    | 57.1 (7.7)   | 54.6 (8.0)   | 52.2 (7.9)    | 58.7 (7.1)   | 56.6 (7.8)   | 54.4 (8.1)    | 58.7 (7.1)   | 56.5 (7.7)   | 54.7 (8.0)    |
| Appendicular skeletal muscle (kg), mean (SD)     | 15.7 (1.0)   | 16.7 (1.0)   | 18.0 (1.3)    | 16.7 (1.0)   | 17.8 (0.9)   | 19.2 (1.2)    | 18.7 (1.5)   | 20.0 (1.5)   | 22.1 (2.3)    |
| Fat mass (kg), mean (SD)                         | 17.8 (2.8)   | 17.1 (3.1)   | 16.4 (3.4)    | 25.1 (2.1)   | 24.9 (2.1)   | 24.9 (2.1)    | 36.1 (6.7)   | 36.3 (6.9)   | 38.8 (8.8)    |
| Body mass index (BMI), mean (SD)                 | 21.8 (1.7)   | 22.5 (1.8)   | 23.1 (1.9)    | 24.9 (1.6)   | 25.9 (1.6)   | 26.9 (1.8)    | 30.0 (3.5)   | 31.5 (3.7)   | 34.0 (4.7)    |
| Weight, mean (SD)                                | 56.8 (4.4)   | 58.6 (4.8)   | 60.9 (5.3)    | 66.1 (3.6)   | 68.4 (3.6)   | 71.5 (4.0)    | 80.9 (9.2)   | 84.0 (9.5)   | 90.9 (12.6)   |
| Height, mean (SD)                                | 161.6 (6.2)  | 161.6 (6.1)  | 162.5 (6.1)   | 163.1 (6.1)  | 162.6 (6.1)  | 163.1 (6.2)   | 164.2 (6.2)  | 163.5 (6.1)  | 163.6 (6.2)   |
| Higher education, n (%)                          | 9086 (41.3)  | 9855 (44.8)  | 10384 (47.2)  | 8069 (37.2)  | 8681 (39.9)  | 9277 (42.7)   | 7548 (35.0)  | 7976 (37.0)  | 8302 (38.5)   |
| Current smokers, n (%)                           | 1977 (9.0)   | 1946 (8.8)   | 2027 (9.2)    | 1652 (7.6)   | 1721 (7.9)   | 1795 (8.3)    | 1596 (7.4)   | 1618 (7.5)   | 1737 (8.1)    |
| Low fruit and vegetable intake, n (%)            | 7248 (33.0)  | 6664 (30.3)  | 6047 (27.5)   | 6700 (30.9)  | 6491 (29.9)  | 6072 (28.0)   | 6863 (31.8)  | 6737 (31.2)  | 6424 (29.8)   |
| High saturated intake, n (%)                     | 5875 (26.7)  | 5960 (27.1)  | 5867 (26.7)   | 6416 (29.5)  | 6303 (29.0)  | 6340 (29.2)   | 6864 (31.8)  | 6720 (31.2)  | 6710 (31.1)   |
| Low oily fish intake, n (%)                      | 6984 (31.8)  | 7159 (32.5)  | 7342 (33.4)   | 6680 (30.8)  | 6845 (31.5)  | 7228 (33.3)   | 6969 (32.3)  | 7150 (33.1)  | 7311 (33.9)   |
| Heavy drinkers, n (%)                            | 7167 (32.6)  | 7649 (34.8)  | 7893 (35.9)   | 7415 (34.1)  | 7400 (34.0)  | 7428 (34.2)   | 6840 (31.7)  | 6542 (30.3)  | 5752 (26.7)   |
| Low physical activity, n (%)                     | 4468 (20.3)  | 3679 (16.7)  | 2965 (13.5)   | 4922 (22.7)  | 4536 (20.9)  | 4116 (19.0)   | 6478 (30.0)  | 6130 (28.4)  | 6051 (28.1)   |
| Hypertension, n (%)                              | 7938 (36.1)  | 6817 (31.0)  | 5918 (26.9)   | 9983 (46.0)  | 9342 (43.0)  | 8681 (40.0)   | 12572 (58.3) | 11981 (55.5) | 12455 (57.8)  |
| Diabetes, n (%)                                  | 155 (0.7)    | 138 (0.6)    | 175 (0.8)     | 247 (1.1)    | 285 (1.3)    | 362 (1.7)     | 626 (2.9)    | 786 (3.7)    | 1258 (5.9)    |
| Cholesterol medication, n (%)                    | 1357 (6.2)   | 979 (4.5)    | 695 (3.2)     | 2057 (9.5)   | 1829 (8.5)   | 1607 (7.5)    | 3079 (14.4)  | 2720 (12.7)  | 2834 (13.3)   |
| Cancer diagnosed by doctor (>5 years ago), n (%) | 1270 (5.8)   | 1077 (4.9)   | 932 (4.2)     | 1433 (6.6)   | 1173 (5.4)   | 1092 (5.0)    | 1358 (6.3)   | 1175 (5.5)   | 1116 (5.2)    |
| Menopause, n (%)                                 | 14788 (67.3) | 12378 (56.3) | 9432 (42.9)   | 15674 (72.2) | 13585 (62.5) | 11126 (51.2)  | 15109 (70.1) | 13077 (60.6) | 10896 (50.6)  |

All characteristics were determined at the baseline assessment clinic through touch-screen questionnaires, interviews and/or physical measurements. Higher education: has a college or university degree or professional qualifications. Low physical activity: <600 metabolic equivalent (MET)-minutes per week<sup>32</sup>. Heavy alcohol drinker: drinking >14 units of alcohol a week<sup>137</sup>. Hypertension: if participants had a systolic blood pressure >140mmHg, diastolic blood pressure >90mmHg, had been diagnosed by a doctor or were taking medication to lower blood pressure. Diabetes and high cholesterol: participants were taking medication for these conditions or diagnosed by a doctor. Cancer history: diagnosed with cancer >5 years ago (those with more recent cancer had been excluded). Low fruit and vegetable intake: the lowest consumption tertile (< 21 portions per week). High saturated fat: the highest saturated fat tertile, based off portions per week of beef, lamb, pork and whether they consumed animal or plant-based spreads. Low oily fish: lowest consumption tertile (< 1 portion per week).



Table S6. Partial correlation coefficients between appendicular skeletal muscle mass, fat mass and height, adjusted for age at recruitment.

| <b>Men</b>   | <b>aSMM</b> | <b>FM</b> | <b>Height</b> |
|--------------|-------------|-----------|---------------|
| aSMM         | -           | 0.7132    | 0.5185        |
| FM           | 0.7132      | -         | 0.1375        |
| Height       | 0.5185      | 0.1375    | -             |
| <b>Women</b> | <b>aSMM</b> | <b>FM</b> | <b>Height</b> |
| aSMM         | -           | 0.7771    | 0.4403        |
| FM           | 0.7771      | -         | 0.1544        |
| Height       | 0.4403      | 0.1544    | -             |

Table S7. CVD sequential model adjustment.

**Hazard ratios of CVD associated with appendicular skeletal muscle mass (aSMM) and fat mass (FM)**

|                                                 | Quintile              | No. events | Age and height adjusted | + Socio-demographics* | + Lifestyle factors <sup>†</sup> | + Medical history <sup>‡</sup> | + Mutual adjustment for ASM or FM |
|-------------------------------------------------|-----------------------|------------|-------------------------|-----------------------|----------------------------------|--------------------------------|-----------------------------------|
| <b>Appendicular skeletal muscle mass (aSMM)</b> |                       |            |                         |                       |                                  |                                |                                   |
| <b>Men</b>                                      | 1                     | 4373       | 1 (reference)           | 1 (reference)         | 1 (reference)                    | 1 (reference)                  | 1 (reference)                     |
|                                                 | 2                     | 3715       | 0.99 (0.95 - 1.03)      | 1.00 (0.96 - 1.04)    | 1.01 (0.97 - 1.06)               | 1.01 (0.97 - 1.06)             | 1.02 (0.97 - 1.06)                |
|                                                 | 3                     | 3385       | 1.03 (0.98 - 1.08)      | 1.04 (1.00 - 1.09)    | 1.06 (1.01 - 1.11)               | 1.06 (1.01 - 1.11)             | 1.07 (1.02 - 1.12)                |
|                                                 | 4                     | 3055       | 1.07 (1.02 - 1.12)      | 1.08 (1.03 - 1.14)    | 1.11 (1.06 - 1.16)               | 1.10 (1.05 - 1.15)             | 1.10 (1.05 - 1.16)                |
|                                                 | 5                     | 2971       | 1.25 (1.19 - 1.31)      | 1.26 (1.20 - 1.32)    | 1.29 (1.23 - 1.35)               | 1.27 (1.21 - 1.33)             | 1.25 (1.19 - 1.31)                |
|                                                 | Non-linearity p-value |            | p<0.001                 | p<0.001               | p<0.001                          | p<0.001                        | p<0.001                           |
|                                                 |                       | $\chi^2$   | 103                     | 106                   | 120                              | 106                            | 87                                |
| <b>Women</b>                                    | 1                     | 2617       | 1 (reference)           | 1 (reference)         | 1 (reference)                    | 1 (reference)                  | 1 (reference)                     |
|                                                 | 2                     | 2182       | 0.92 (0.87 - 0.97)      | 0.93 (0.88 - 0.98)    | 0.93 (0.88 - 0.99)               | 0.93 (0.88 - 0.98)             | 0.95 (0.90 - 1.01)                |
|                                                 | 3                     | 1848       | 0.85 (0.80 - 0.91)      | 0.87 (0.82 - 0.92)    | 0.87 (0.82 - 0.93)               | 0.87 (0.82 - 0.92)             | 0.89 (0.84 - 0.95)                |
|                                                 | 4                     | 1753       | 0.89 (0.83 - 0.94)      | 0.90 (0.85 - 0.96)    | 0.91 (0.86 - 0.97)               | 0.90 (0.85 - 0.96)             | 0.92 (0.87 - 0.98)                |
|                                                 | 5                     | 1885       | 1.08 (1.02 - 1.15)      | 1.09 (1.03 - 1.16)    | 1.09 (1.03 - 1.16)               | 1.06 (1.00 - 1.13)             | 1.03 (0.97 - 1.09)                |
|                                                 | Non-linearity p-value |            | p<0.001                 | p<0.001               | p<0.001                          | p<0.001                        | p<0.001                           |
|                                                 |                       | $\chi^2$   | 69                      | 63                    | 59                               | 51                             | 26                                |
| <b>Fat mass (FM)</b>                            |                       |            |                         |                       |                                  |                                |                                   |
| <b>Men</b>                                      | 1                     | 2565       | 1 (reference)           | 1 (reference)         | 1 (reference)                    | 1 (reference)                  | 1 (reference)                     |
|                                                 | 2                     | 3097       | 1.14 (1.08 - 1.20)      | 1.14 (1.08 - 1.20)    | 1.15 (1.09 - 1.21)               | 1.14 (1.09 - 1.21)             | 1.16 (1.10 - 1.22)                |
|                                                 | 3                     | 3393       | 1.25 (1.19 - 1.31)      | 1.24 (1.18 - 1.31)    | 1.25 (1.19 - 1.32)               | 1.24 (1.18 - 1.31)             | 1.26 (1.20 - 1.33)                |
|                                                 | 4                     | 3835       | 1.42 (1.35 - 1.49)      | 1.40 (1.33 - 1.47)    | 1.40 (1.33 - 1.48)               | 1.38 (1.31 - 1.45)             | 1.40 (1.33 - 1.47)                |
|                                                 | 5                     | 4609       | 1.76 (1.68 - 1.85)      | 1.71 (1.63 - 1.79)    | 1.71 (1.62 - 1.79)               | 1.65 (1.57 - 1.73)             | 1.65 (1.57 - 1.73)                |
|                                                 | Non-linearity p-value |            | p<0.001                 | 0.002                 | 0.005                            | 0.024                          | 0.081                             |
|                                                 |                       | $\chi^2$   | 654                     | 571                   | 638                              | 455                            | 453                               |
| <b>Women</b>                                    | 1                     | 1313       | 1 (reference)           | 1 (reference)         | 1 (reference)                    | 1 (reference)                  | 1 (reference)                     |
|                                                 | 2                     | 1653       | 1.16 (1.08 - 1.25)      | 1.15 (1.07 - 1.24)    | 1.16 (1.08 - 1.25)               | 1.16 (1.08 - 1.24)             | 1.16 (1.08 - 1.25)                |
|                                                 | 3                     | 2037       | 1.32 (1.23 - 1.42)      | 1.30 (1.21 - 1.39)    | 1.31 (1.22 - 1.40)               | 1.30 (1.21 - 1.39)             | 1.31 (1.22 - 1.40)                |
|                                                 | 4                     | 2357       | 1.56 (1.46 - 1.67)      | 1.51 (1.41 - 1.62)    | 1.51 (1.41 - 1.62)               | 1.49 (1.39 - 1.59)             | 1.50 (1.40 - 1.61)                |
|                                                 | 5                     | 2925       | 2.07 (1.94 - 2.21)      | 1.97 (1.84 - 2.10)    | 1.95 (1.82 - 2.08)               | 1.88 (1.76 - 2.01)             | 1.88 (1.76 - 2.01)                |
|                                                 | Non-linearity p-value |            | p<0.001                 | p<0.001               | 0.003                            | 0.016                          | 0.038                             |
|                                                 |                       | $\chi^2$   | 639                     | 540                   | 491                              | 430                            | 429                               |

Test for non-linearity across quintiles conducted using LRTs with 4df (p<0.05 indicates significant departure from linearity). Adjusted hazard ratios (HR) and 95% confidence intervals (CI) obtained using Cox proportional hazard regression. Age at risk adjusted for by using age during study as the underlying timescale for Cox regression. Height adjusted for by inclusion as continuous variable for FM and by regression out of variation due to height for ASM. \*Sociodemographic characteristics: Townsend index of deprivation, education. †Lifestyle factors: smoking status, alcohol intake, physical activity, oily fish intake, fruit and vegetable intake, saturated fat intake. ‡Medical history: diabetes, cancer history, menopause (women).  $\chi^2$  values were calculated from likelihood ratio tests to estimate the improvement in model fit.

Table S8. Mortality sequential model adjustment.

**Hazard ratios of all-cause mortality associated with appendicular skeletal muscle mass (aSMM) and fat mass (FM)**

| Quintile                                        | No. events            | Age and height adjusted | + Socio-demographics* | + Lifestyle factors <sup>†</sup> | + Medical history <sup>‡</sup> | + Mutual adjustment for ASM or FM |
|-------------------------------------------------|-----------------------|-------------------------|-----------------------|----------------------------------|--------------------------------|-----------------------------------|
| <b>Appendicular skeletal muscle mass (aSMM)</b> |                       |                         |                       |                                  |                                |                                   |
| <b>Men</b>                                      | 1                     | 2706                    | 1 (reference)         | 1 (reference)                    | 1 (reference)                  | 1 (reference)                     |
|                                                 | 2                     | 2013                    | 0.94 (0.88 - 0.99)    | 0.95 (0.90 - 1.01)               | 0.97 (0.92 - 1.03)             | 0.97 (0.92 - 1.03)                |
|                                                 | 3                     | 1673                    | 0.94 (0.88 - 1.00)    | 0.96 (0.90 - 1.02)               | 0.99 (0.93 - 1.05)             | 0.99 (0.93 - 1.05)                |
|                                                 | 4                     | 1378                    | 0.94 (0.88 - 1.00)    | 0.96 (0.89 - 1.02)               | 1.00 (0.93 - 1.07)             | 0.99 (0.93 - 1.06)                |
|                                                 | 5                     | 1312                    | 1.12 (1.05 - 1.20)    | 1.13 (1.06 - 1.21)               | 1.19 (1.11 - 1.27)             | 1.17 (1.09 - 1.25)                |
|                                                 | Non-linearity p-value |                         | p<0.001               | p<0.001                          | p<0.001                        | p<0.001                           |
|                                                 | $\chi^2$              | 33                      | 30                    | 34                               | 29                             | 25                                |
| <b>Women</b>                                    | 1                     | 1732                    | 1 (reference)         | 1 (reference)                    | 1 (reference)                  | 1 (reference)                     |
|                                                 | 2                     | 1391                    | 0.91 (0.85 - 0.98)    | 0.92 (0.86 - 0.99)               | 0.93 (0.86 - 0.99)             | 0.92 (0.86 - 0.99)                |
|                                                 | 3                     | 1255                    | 0.92 (0.86 - 0.99)    | 0.93 (0.87 - 1.00)               | 0.94 (0.87 - 1.01)             | 0.94 (0.88 - 1.01)                |
|                                                 | 4                     | 1176                    | 0.96 (0.89 - 1.03)    | 0.97 (0.90 - 1.04)               | 0.98 (0.91 - 1.06)             | 0.98 (0.91 - 1.06)                |
|                                                 | 5                     | 1208                    | 1.11 (1.03 - 1.20)    | 1.11 (1.03 - 1.20)               | 1.13 (1.05 - 1.22)             | 1.12 (1.03 - 1.20)                |
|                                                 | Non-linearity p-value |                         | p<0.001               | p<0.001                          | p<0.001                        | p<0.001                           |
|                                                 | $\chi^2$              | 31                      | 28                    | 29                               | 26                             | 21                                |
| <b>Fat mass (FM)</b>                            |                       |                         |                       |                                  |                                |                                   |
| <b>Men</b>                                      | 1                     | 1573                    | 1 (reference)         | 1 (reference)                    | 1 (reference)                  | 1 (reference)                     |
|                                                 | 2                     | 1542                    | 0.89 (0.83 - 0.95)    | 0.89 (0.83 - 0.95)               | 0.90 (0.84 - 0.96)             | 0.89 (0.83 - 0.96)                |
|                                                 | 3                     | 1727                    | 0.97 (0.91 - 1.04)    | 0.96 (0.90 - 1.03)               | 0.97 (0.91 - 1.04)             | 0.96 (0.90 - 1.03)                |
|                                                 | 4                     | 1870                    | 1.05 (0.98 - 1.12)    | 1.02 (0.96 - 1.1)                | 1.02 (0.95 - 1.09)             | 1.00 (0.94 - 1.07)                |
|                                                 | 5                     | 2370                    | 1.35 (1.27 - 1.44)    | 1.28 (1.2 - 1.37)                | 1.27 (1.19 - 1.35)             | 1.22 (1.14 - 1.31)                |
|                                                 | Non-linearity p-value |                         | p<0.001               | p<0.001                          | p<0.001                        | p<0.001                           |
|                                                 | $\chi^2$              | 198                     | 145                   | 126                              | 101                            | 98                                |
| <b>Women</b>                                    | 1                     | 1126                    | 1 (reference)         | 1 (reference)                    | 1 (reference)                  | 1 (reference)                     |
|                                                 | 2                     | 1228                    | 0.97 (0.90 - 1.06)    | 0.97 (0.89 - 1.05)               | 0.98 (0.90 - 1.06)             | 0.98 (0.90 - 1.06)                |
|                                                 | 3                     | 1321                    | 0.95 (0.87 - 1.03)    | 0.94 (0.86 - 1.01)               | 0.94 (0.86 - 1.02)             | 0.93 (0.86 - 1.01)                |
|                                                 | 4                     | 1414                    | 1.02 (0.94 - 1.10)    | 0.99 (0.92 - 1.08)               | 0.98 (0.91 - 1.07)             | 0.98 (0.90 - 1.06)                |
|                                                 | 5                     | 1673                    | 1.27 (1.18 - 1.37)    | 1.21 (1.12 - 1.31)               | 1.18 (1.09 - 1.28)             | 1.16 (1.07 - 1.26)                |
|                                                 | Non-linearity p-value |                         | p<0.001               | p<0.001                          | p<0.001                        | p<0.001                           |
|                                                 | $\chi^2$              | 82                      | 62                    | 47                               | 41                             | 37                                |

Test for non-linearity across quintiles conducted using LRTs with 4df (p<0.05 indicates significant departure from linearity). Adjusted hazard ratios (HR) and 95% confidence intervals (CI) obtained using Cox proportional hazard regression. Age at risk adjusted for by using age during study as the underlying timescale for Cox regression. Height adjusted for by inclusion as continuous variable for FM and by regression out of variation due to height for ASM. \*Sociodemographic characteristics: Townsend index of deprivation, education. †Lifestyle factors: smoking status, alcohol intake, physical activity, oily fish intake, fruit and vegetable intake, saturated fat intake. ‡Medical history: diabetes, cancer history, menopause (women).  $\chi^2$  values were calculated from likelihood ratio tests to estimate the improvement in model fit.

Table S9. CVD sensitivity analyses.

**Hazard ratios of CVD associated with appendicular skeletal muscle mass (aSMM) and fat mass (FM)**

| Quintile                                        | Remove first 2 years of follow up |             | Remove outliers    |             | Remove participants with BMI > 35 |             |                    |
|-------------------------------------------------|-----------------------------------|-------------|--------------------|-------------|-----------------------------------|-------------|--------------------|
|                                                 | No. events                        | HR (95% CI) | No. events         | HR (95% CI) | No. events                        | HR (95% CI) |                    |
| <b>Appendicular skeletal muscle mass (aSMM)</b> |                                   |             |                    |             |                                   |             |                    |
| <b>Men</b>                                      | 1                                 | 3804        | 1 (reference)      | 4316        | 1 (reference)                     | 4283        | 1 (reference)      |
|                                                 | 2                                 | 3250        | 1.06 (1.01 - 1.11) | 3715        | 1.02 (0.97 - 1.06)                | 3614        | 1.03 (0.98 - 1.08) |
|                                                 | 3                                 | 2939        | 1.12 (1.06 - 1.17) | 3385        | 1.07 (1.02 - 1.12)                | 3198        | 1.07 (1.02 - 1.12) |
|                                                 | 4                                 | 2666        | 1.19 (1.13 - 1.25) | 3055        | 1.10 (1.05 - 1.16)                | 2800        | 1.11 (1.06 - 1.17) |
|                                                 | 5                                 | 2597        | 1.37 (1.30 - 1.44) | 2819        | 1.23 (1.17 - 1.29)                | 2448        | 1.25 (1.18 - 1.31) |
| Non-linearity p-value                           |                                   | 0.038       |                    | 0.057       |                                   | 0.046       |                    |
| <b>Women</b>                                    | 1                                 | 2327        | 1 (reference)      | 2582        | 1 (reference)                     | 2505        | 1 (reference)      |
|                                                 | 2                                 | 1947        | 0.97 (0.91 - 1.03) | 2182        | 0.95 (0.90 - 1.01)                | 2075        | 0.96 (0.90 - 1.01) |
|                                                 | 3                                 | 1667        | 0.93 (0.87 - 0.99) | 1848        | 0.89 (0.84 - 0.95)                | 1699        | 0.88 (0.83 - 0.94) |
|                                                 | 4                                 | 1570        | 0.96 (0.90 - 1.02) | 1753        | 0.92 (0.87 - 0.98)                | 1555        | 0.92 (0.86 - 0.98) |
|                                                 | 5                                 | 1681        | 1.08 (1.01 - 1.15) | 1682        | 1.01 (0.95 - 1.07)                | 1375        | 1.01 (0.94 - 1.08) |
| Non-linearity p-value                           |                                   | p<0.001     |                    | p<0.001     |                                   | p<0.001     |                    |
| <b>Fat Mass (FM)</b>                            |                                   |             |                    |             |                                   |             |                    |
| <b>Men</b>                                      | 1                                 | 2293        | 1 (reference)      | 2565        | 1 (reference)                     | 2565        | 1 (reference)      |
|                                                 | 2                                 | 2701        | 1.13 (1.07 - 1.19) | 3097        | 1.16 (1.1 - 1.22)                 | 3097        | 1.16 (1.10 - 1.22) |
|                                                 | 3                                 | 2907        | 1.20 (1.14 - 1.27) | 3393        | 1.26 (1.19 - 1.32)                | 3393        | 1.26 (1.19 - 1.32) |
|                                                 | 4                                 | 3341        | 1.36 (1.28 - 1.43) | 3835        | 1.40 (1.33 - 1.47)                | 3828        | 1.40 (1.33 - 1.47) |
|                                                 | 5                                 | 4014        | 1.60 (1.51 - 1.68) | 3994        | 1.62 (1.54 - 1.71)                | 3460        | 1.61 (1.53 - 1.70) |
| Non-linearity p-value                           |                                   | 0.038       |                    | 0.211       |                                   | 0.286       |                    |
| <b>Women</b>                                    | 1                                 | 1173        | 1 (reference)      | 1313        | 1 (reference)                     | 1313        | 1 (reference)      |
|                                                 | 2                                 | 1487        | 1.16 (1.07 - 1.25) | 1653        | 1.16 (1.08 - 1.25)                | 1652        | 1.15 (1.07 - 1.24) |
|                                                 | 3                                 | 1806        | 1.27 (1.18 - 1.37) | 2037        | 1.30 (1.21 - 1.40)                | 2037        | 1.29 (1.21 - 1.39) |
|                                                 | 4                                 | 2118        | 1.48 (1.37 - 1.59) | 2357        | 1.50 (1.40 - 1.60)                | 2351        | 1.49 (1.39 - 1.59) |
|                                                 | 5                                 | 2608        | 1.84 (1.71 - 1.98) | 2493        | 1.82 (1.70 - 1.96)                | 1856        | 1.76 (1.63 - 1.89) |
| Non-linearity p-value                           |                                   | 0.026       |                    | 0.230       |                                   | 0.681       |                    |

Test for non-linearity across quintiles conducted using LRTs with 4df ( $p < 0.05$  indicates significant departure from linearity). Adjusted hazard ratios (HR) and 95% confidence intervals (CI) obtained using Cox proportional hazard regression. Adjusted for age at risk, Townsend index of deprivation, education, smoking status, alcohol intake, physical activity, oily fish intake, fruit and vegetable intake, saturated fat intake, diabetes, cancer history, menopause (women), and mutually adjusted for FM and ASM. Height is adjusted for by inclusion as continuous variable for FM and by regression out of variation due to height for ASM. For the analysis without outliers, the top and bottom 25% of values were removed.

Table S10. CVD mediation analyses.

**Hazard ratios of CVD associated with appendicular skeletal muscle mass (aSMM) and fat mass (FM)**

|                                                 | Quintile                | No. events | Adjust for BMI     | Adjust for hypertension | Adjust for cholesterol |
|-------------------------------------------------|-------------------------|------------|--------------------|-------------------------|------------------------|
| <b>Appendicular skeletal muscle mass (aSMM)</b> |                         |            |                    |                         |                        |
| <b>Men</b>                                      | 1                       | 2861       | 1 (reference)      | 1 (reference)           | 1 (reference)          |
|                                                 | 2                       | 2457       | 0.96 (0.92 - 1.01) | 1.02 (0.98 - 1.07)      | 1.03 (0.99 - 1.08)     |
|                                                 | 3                       | 2209       | 0.97 (0.93 - 1.02) | 1.06 (1.02 - 1.11)      | 1.08 (1.03 - 1.14)     |
|                                                 | 4                       | 2004       | 0.98 (0.93 - 1.03) | 1.10 (1.05 - 1.16)      | 1.14 (1.09 - 1.20)     |
|                                                 | 5                       | 1907       | 1.04 (0.99 - 1.10) | 1.23 (1.17 - 1.29)      | 1.28 (1.21 - 1.35)     |
|                                                 | Non-linearity p-value   |            | 0.015              | 0.031                   | 0.123                  |
|                                                 | Main model $\chi^2$     |            | 106                | 87                      | 74                     |
|                                                 | Adjusted model $\chi^2$ |            | 12                 | 79                      | 92                     |
| % Change                                        |                         | 87%        | 9%                 | 20%                     |                        |
| <b>Women</b>                                    | 1                       | 2617       | 1 (reference)      | 1 (reference)           | 1 (reference)          |
|                                                 | 2                       | 2182       | 0.92 (0.87 - 0.97) | 0.95 (0.90 - 1.01)      | 0.93 (0.88 - 0.99)     |
|                                                 | 3                       | 1848       | 0.84 (0.79 - 0.89) | 0.90 (0.84 - 0.95)      | 0.87 (0.82 - 0.93)     |
|                                                 | 4                       | 1753       | 0.84 (0.79 - 0.90) | 0.92 (0.87 - 0.98)      | 0.94 (0.88 - 1.00)     |
|                                                 | 5                       | 1885       | 0.90 (0.85 - 0.96) | 1.02 (0.96 - 1.09)      | 1.04 (0.98 - 1.11)     |
|                                                 | Non-linearity p-value   |            | p<0.001            | p<0.001                 | p<0.001                |
|                                                 | Main model $\chi^2$     |            | 51                 | 26                      | 29                     |
|                                                 | Adjusted model $\chi^2$ |            | 43                 | 23                      | 30                     |
| % Change                                        |                         | 17%        | 12%                | 3%                      |                        |
| <b>Fat mass (FM)</b>                            |                         |            |                    |                         |                        |
| <b>Men</b>                                      | 1                       | 2565       | 1 (reference)      | 1 (reference)           | 1 (reference)          |
|                                                 | 2                       | 3097       | 1.05 (0.99 - 1.10) | 1.12 (1.06 - 1.18)      | 1.09 (1.03 - 1.15)     |
|                                                 | 3                       | 3393       | 1.06 (1.00 - 1.12) | 1.19 (1.13 - 1.25)      | 1.15 (1.09 - 1.22)     |
|                                                 | 4                       | 3835       | 1.09 (1.03 - 1.16) | 1.29 (1.22 - 1.36)      | 1.27 (1.20 - 1.34)     |
|                                                 | 5                       | 4609       | 1.10 (1.01 - 1.19) | 1.48 (1.41 - 1.56)      | 1.49 (1.41 - 1.58)     |
|                                                 | Non-linearity p-value   |            | 0.726              | 0.102                   | 0.009                  |
|                                                 | Main model $\chi^2$     |            | 455                | 453                     | 398                    |
|                                                 | Adjusted model $\chi^2$ |            | 8                  | 274                     | 252                    |
| % Change                                        |                         | 98%        | 40%                | 37%                     |                        |
| <b>Women</b>                                    | 1                       | 1313       | 1 (reference)      | 1 (reference)           | 1 (reference)          |
|                                                 | 2                       | 1653       | 1.07 (0.99 - 1.16) | 1.12 (1.05 - 1.21)      | 1.13 (1.05 - 1.23)     |
|                                                 | 3                       | 2037       | 1.13 (1.05 - 1.22) | 1.23 (1.15 - 1.32)      | 1.25 (1.16 - 1.35)     |
|                                                 | 4                       | 2357       | 1.21 (1.11 - 1.32) | 1.37 (1.28 - 1.47)      | 1.40 (1.30 - 1.52)     |
|                                                 | 5                       | 2925       | 1.29 (1.15 - 1.46) | 1.64 (1.54 - 1.76)      | 1.73 (1.60 - 1.87)     |
|                                                 | Non-linearity p-value   |            | 0.991              | 0.119                   | 0.047                  |
|                                                 | Main model $\chi^2$     |            | 430                | 429                     | 398                    |
|                                                 | Adjusted model $\chi^2$ |            | 20                 | 258                     | 259                    |
| % Change                                        |                         | 95%        | 40%                | 35%                     |                        |

Adjusted hazard ratios (HR) and 95% confidence intervals (CI) obtained using Cox proportional hazard regression. Adjusted for age at risk, Townsend index of deprivation, education, smoking status, alcohol intake, physical activity, oily fish intake, fruit and vegetable intake, saturated fat intake, diabetes, cancer history, menopause (women), and mutually adjusted for FM and ASM ASM (except for the model adjusted for BMI). Height is adjusted for by inclusion as continuous variable for FM and by regression out of variation due to height for ASM. Test for non-linearity across quintiles conducted using LRTs with 4df (p<0.05 indicates significant departure from linearity). The  $\chi^2$  values were calculated from likelihood ratio tests to estimate the improvement in model fit.

Table S11. Mortality sensitivity analyses.

**Hazard ratios of all-cause mortality associated with appendicular skeletal muscle mass (aSMM) and fat mass (FM)**

| Quintile                                        | Remove first 2 years of follow up |             | Remove outliers    |             | Remove participants with BMI > 35 |             |                    |
|-------------------------------------------------|-----------------------------------|-------------|--------------------|-------------|-----------------------------------|-------------|--------------------|
|                                                 | No. events                        | HR (95% CI) | No. events         | HR (95% CI) | No. events                        | HR (95% CI) |                    |
| <b>Appendicular skeletal muscle mass (aSMM)</b> |                                   |             |                    |             |                                   |             |                    |
| <b>Men</b>                                      | 1                                 | 2532        | 1 (reference)      | 2660        | 1 (reference)                     | 2648        | 1 (reference)      |
|                                                 | 2                                 | 1897        | 1.00 (0.94 - 1.06) | 2013        | 0.98 (0.92 - 1.04)                | 1941        | 0.98 (0.92 - 1.04) |
|                                                 | 3                                 | 1566        | 1.02 (0.96 - 1.09) | 1673        | 0.99 (0.93 - 1.06)                | 1568        | 0.98 (0.92 - 1.05) |
|                                                 | 4                                 | 1283        | 1.03 (0.97 - 1.11) | 1378        | 1.00 (0.93 - 1.07)                | 1259        | 0.99 (0.93 - 1.06) |
|                                                 | 5                                 | 1219        | 1.22 (1.14 - 1.31) | 1263        | 1.16 (1.08 - 1.24)                | 1076        | 1.13 (1.05 - 1.22) |
| Non-linearity p-value                           |                                   | 0.004       |                    | 0.002       |                                   | 0.011       |                    |
| <b>Women</b>                                    | 1                                 | 1647        | 1 (reference)      | 1712        | 1 (reference)                     | 1663        | 1 (reference)      |
|                                                 | 2                                 | 1307        | 0.93 (0.86 - 1.00) | 1391        | 0.93 (0.87 - 1.00)                | 1327        | 0.93 (0.86 - 1.00) |
|                                                 | 3                                 | 1183        | 0.96 (0.89 - 1.03) | 1255        | 0.95 (0.89 - 1.03)                | 1159        | 0.93 (0.86 - 1.00) |
|                                                 | 4                                 | 1119        | 1.01 (0.93 - 1.09) | 1176        | 0.99 (0.92 - 1.07)                | 1072        | 0.98 (0.90 - 1.05) |
|                                                 | 5                                 | 1148        | 1.13 (1.05 - 1.22) | 1093        | 1.09 (1.01 - 1.18)                | 932         | 1.06 (0.98 - 1.15) |
| Non-linearity p-value                           |                                   | 0.001       |                    | 0.008       |                                   | 0.006       |                    |
| <b>Fat Mass (FM)</b>                            |                                   |             |                    |             |                                   |             |                    |
| <b>Men</b>                                      | 1                                 | 1468        | 1 (reference)      | 1573        | 1 (reference)                     | 1573        | 1 (reference)      |
|                                                 | 2                                 | 1451        | 0.90 (0.84 - 0.97) | 1542        | 0.90 (0.83 - 0.96)                | 1542        | 0.89 (0.83 - 0.96) |
|                                                 | 3                                 | 1620        | 0.97 (0.90 - 1.04) | 1727        | 0.97 (0.90 - 1.04)                | 1727        | 0.97 (0.90 - 1.03) |
|                                                 | 4                                 | 1742        | 1.00 (0.93 - 1.07) | 1870        | 1.01 (0.94 - 1.08)                | 1869        | 1.00 (0.94 - 1.07) |
|                                                 | 5                                 | 2216        | 1.22 (1.14 - 1.30) | 2039        | 1.19 (1.11 - 1.27)                | 1781        | 1.17 (1.09 - 1.25) |
| Non-linearity p-value                           |                                   | p<0.001     |                    | p<0.001     |                                   | p<0.001     |                    |
| <b>Women</b>                                    | 1                                 | 1058        | 1 (reference)      | 1126        | 1 (reference)                     | 1126        | 1 (reference)      |
|                                                 | 2                                 | 1162        | 0.99 (0.91 - 1.07) | 1228        | 0.98 (0.90 - 1.06)                | 1228        | 0.98 (0.90 - 1.06) |
|                                                 | 3                                 | 1244        | 0.94 (0.86 - 1.02) | 1321        | 0.94 (0.87 - 1.02)                | 1321        | 0.93 (0.86 - 1.01) |
|                                                 | 4                                 | 1336        | 0.99 (0.91 - 1.07) | 1414        | 0.99 (0.91 - 1.07)                | 1409        | 0.98 (0.90 - 1.06) |
|                                                 | 5                                 | 1604        | 1.18 (1.09 - 1.28) | 1422        | 1.12 (1.03 - 1.22)                | 1069        | 1.08 (0.99 - 1.17) |
| Non-linearity p-value                           |                                   | p<0.001     |                    | 0.001       |                                   | 0.018       |                    |

Adjusted hazard ratios (HR) and 95% confidence intervals (CI) obtained using Cox proportional hazard regression. Adjusted for age at risk, Townsend index of deprivation, education, smoking status, alcohol intake, physical activity, oily fish intake, fruit and vegetable intake, saturated fat intake, diabetes, cancer history, menopause (women), and mutually adjusted for FM and ASM. Height is adjusted for by inclusion as continuous variable for FM and by regression out of variation due to height for ASM. Test for non-linearity across quintiles conducted using LRTs with 4df (p<0.05 indicates significant departure from linearity). For the analysis without outliers, the top and bottom 25% of values were removed.

Table S12. Mortality mediation analyses.

**Hazard ratios of all-cause mortality associated with appendicular skeletal muscle mass (aSMM) and fat mass (FM)**

|                                                 | Quintile                | No. events | Adjust for BMI     | Adjust for hypertension | Adjust for cholesterol |
|-------------------------------------------------|-------------------------|------------|--------------------|-------------------------|------------------------|
| <b>Appendicular skeletal muscle mass (aSMM)</b> |                         |            |                    |                         |                        |
| <b>Men</b>                                      | 1                       | 2706       | 1 (reference)      | 1 (reference)           | 1 (reference)          |
|                                                 | 2                       | 2013       | 0.95 (0.89 - 1.01) | 0.98 (0.92 - 1.04)      | 0.98 (0.92 - 1.05)     |
|                                                 | 3                       | 1673       | 0.95 (0.89 - 1.01) | 0.99 (0.93 - 1.05)      | 0.97 (0.91 - 1.04)     |
|                                                 | 4                       | 1378       | 0.93 (0.87 - 1.00) | 0.99 (0.93 - 1.06)      | 0.96 (0.89 - 1.03)     |
|                                                 | 5                       | 1312       | 1.06 (0.98 - 1.14) | 1.15 (1.07 - 1.23)      | 1.13 (1.05 - 1.22)     |
|                                                 | Non-linearity p-value   |            | 0.001              | 0.002                   | 0.001                  |
|                                                 | Main model $\chi^2$     |            | 29                 | 25                      | 21                     |
|                                                 | Adjusted model $\chi^2$ |            | 16                 | 24                      | 20                     |
| % Change                                        |                         | 45%        | 4%                 | 5%                      |                        |
| <b>Women</b>                                    | 1                       | 1732       | 1 (reference)      | 1 (reference)           | 1 (reference)          |
|                                                 | 2                       | 1391       | 0.92 (0.86 - 0.99) | 0.93 (0.87 - 1.00)      | 0.93 (0.86 - 1.00)     |
|                                                 | 3                       | 1255       | 0.93 (0.87 - 1.00) | 0.95 (0.89 - 1.03)      | 0.95 (0.88 - 1.03)     |
|                                                 | 4                       | 1176       | 0.96 (0.89 - 1.03) | 0.99 (0.92 - 1.07)      | 0.99 (0.91 - 1.07)     |
|                                                 | 5                       | 1208       | 1.06 (0.98 - 1.14) | 1.10 (1.02 - 1.19)      | 1.10 (1.02 - 1.20)     |
|                                                 | Non-linearity p-value   |            | 0.003              | 0.003                   | 0.004                  |
|                                                 | Main model $\chi^2$     |            | 26                 | 21                      | 21                     |
|                                                 | Adjusted model $\chi^2$ |            | 16                 | 20                      | 19                     |
| % Change                                        |                         | 38%        | 5%                 | 9%                      |                        |
| <b>Fat mass (FM)</b>                            |                         |            |                    |                         |                        |
| <b>Men</b>                                      | 1                       | 1573       | 1 (reference)      | 1 (reference)           | 1 (reference)          |
|                                                 | 2                       | 1542       | 0.86 (0.79 - 0.92) | 0.88 (0.82 - 0.95)      | 0.90 (0.84 - 0.97)     |
|                                                 | 3                       | 1727       | 0.90 (0.83 - 0.97) | 0.94 (0.88 - 1.01)      | 0.98 (0.91 - 1.06)     |
|                                                 | 4                       | 1870       | 0.90 (0.82 - 0.98) | 0.97 (0.91 - 1.04)      | 1.01 (0.94 - 1.09)     |
|                                                 | 5                       | 2370       | 1.01 (0.90 - 1.13) | 1.17 (1.09 - 1.25)      | 1.24 (1.15 - 1.34)     |
|                                                 | Non-linearity p-value   |            | p<0.001            | p<0.001                 | p<0.001                |
|                                                 | Main model $\chi^2$     |            | 101                | 98                      | 88                     |
|                                                 | Adjusted model $\chi^2$ |            | 36                 | 81                      | 87                     |
| % Change                                        |                         | 64%        | 17%                | 1%                      |                        |
| <b>Women</b>                                    | 1                       | 1126       | 1 (reference)      | 1 (reference)           | 1 (reference)          |
|                                                 | 2                       | 1228       | 0.91 (0.84 - 0.99) | 0.98 (0.90 - 1.06)      | 0.97 (0.89 - 1.06)     |
|                                                 | 3                       | 1321       | 0.82 (0.75 - 0.90) | 0.93 (0.86 - 1.01)      | 0.97 (0.89 - 1.06)     |
|                                                 | 4                       | 1414       | 0.81 (0.73 - 0.90) | 0.97 (0.90 - 1.06)      | 1.00 (0.91 - 1.09)     |
|                                                 | 5                       | 1673       | 0.83 (0.71 - 0.96) | 1.13 (1.05 - 1.23)      | 1.16 (1.06 - 1.27)     |
|                                                 | Non-linearity p-value   |            | 0.033              | p<0.001                 | 0.003                  |
|                                                 | Main model $\chi^2$     |            | 41                 | 37                      | 31                     |
|                                                 | Adjusted model $\chi^2$ |            | 22                 | 31                      | 26                     |
| % Change                                        |                         | 46%        | 16%                | 16%                     |                        |

Adjusted hazard ratios (HR) and 95% confidence intervals (CI) obtained using Cox proportional hazard regression. Adjusted for age at risk, Townsend index of deprivation, education, smoking status, alcohol intake, physical activity, oily fish intake, fruit and vegetable intake, saturated fat intake, diabetes, cancer history, menopause (women), and mutually adjusted for FM and ASM (except for the model adjusted for BMI). Height is adjusted for by inclusion as continuous variable for FM and by regression out of variation due to height for ASM. Test for non-linearity across quintiles conducted using LRTs with 4df (p<0.05 indicates significant departure from linearity). The  $\chi^2$  values were calculated from likelihood ratio tests to estimate the improvement in model fit.

Figure S1. Exclusions and selection of the study population included in the analysis from the UK Biobank.

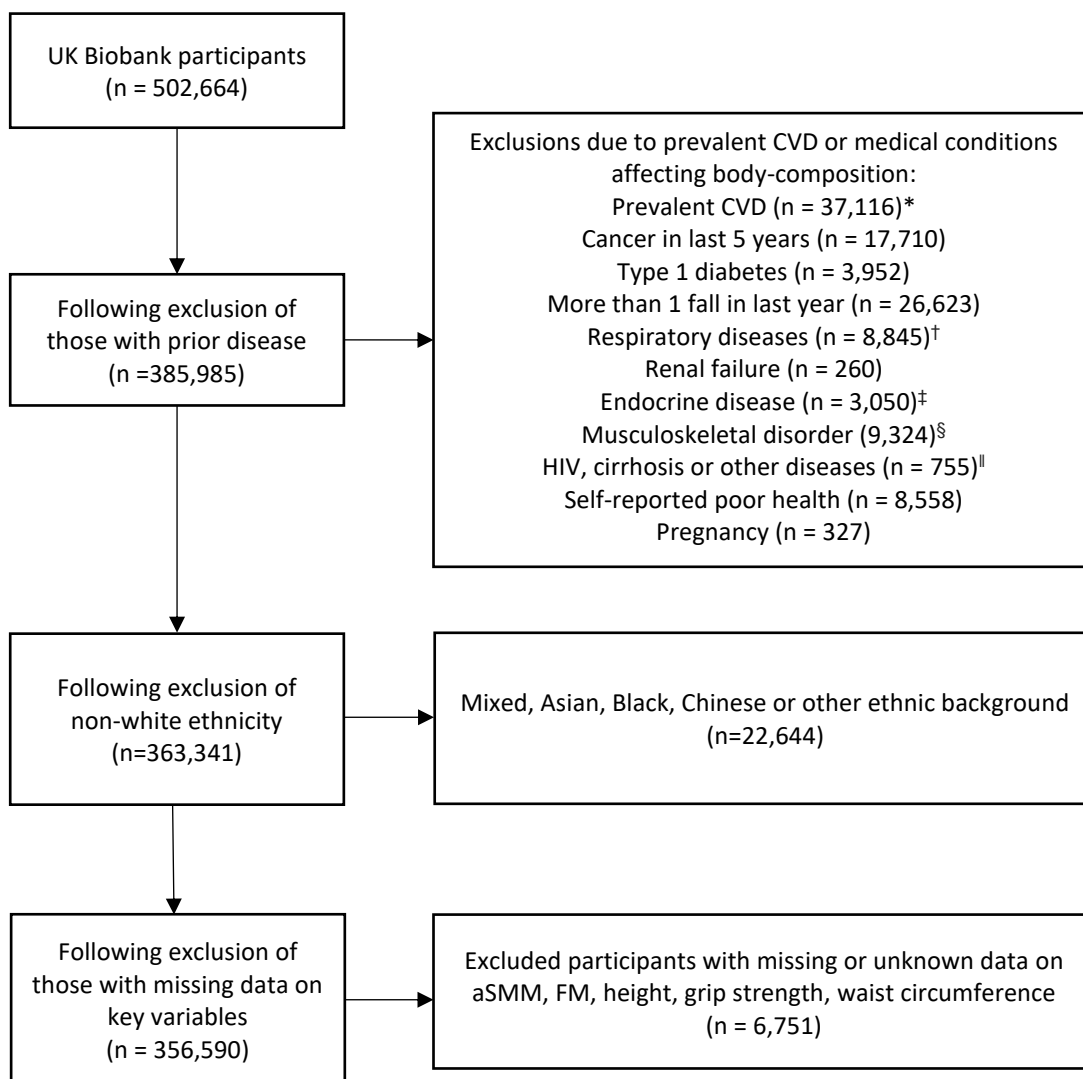

\*Prior CVD: follows the same definition and codes from HES reported in the manuscript as well as self-reported from verbal interviews and touchscreen questionnaire including instances of heart attack/myocardial infarction, heart failure, angina, heart failure, stroke, transient ischaemic attack, subdural haemorrhage, aortic aneurysm rupture, cerebral aneurysm, peripheral vascular disease, leg claudication, arterial embolism, .

†Respiratory diseases: chronic obstructive pulmonary disease, emphysema, chronic bronchitis, bronchiectasis (occurred anytime)

‡Endocrine diseases: Cushing's syndrome, hyperthyroidism (occurred anytime)

§Musculoskeletal diseases: motor neurone disease, osteoporosis, rheumatoid arthritis, fractures (occurred anytime)

¶HIV, cirrhosis or other disease: pancreatitis, encephalitis, meningitis, intracranial abscess, empyema, Stevens Johnson Syndrome and carcinoid syndrome/tumour (occurred in the last year); liver cirrhosis, HIV/AIDS (occurred anytime)



Figure S2. Splines.

**Adjusted hazard ratios (HRs) of incident cardiovascular disease (CVD) and all-cause mortality associated with appendicular skeletal muscle mass (aSMM), whole body fat mass (FM) and body mass index (BMI) estimated using restricted cubic splines**

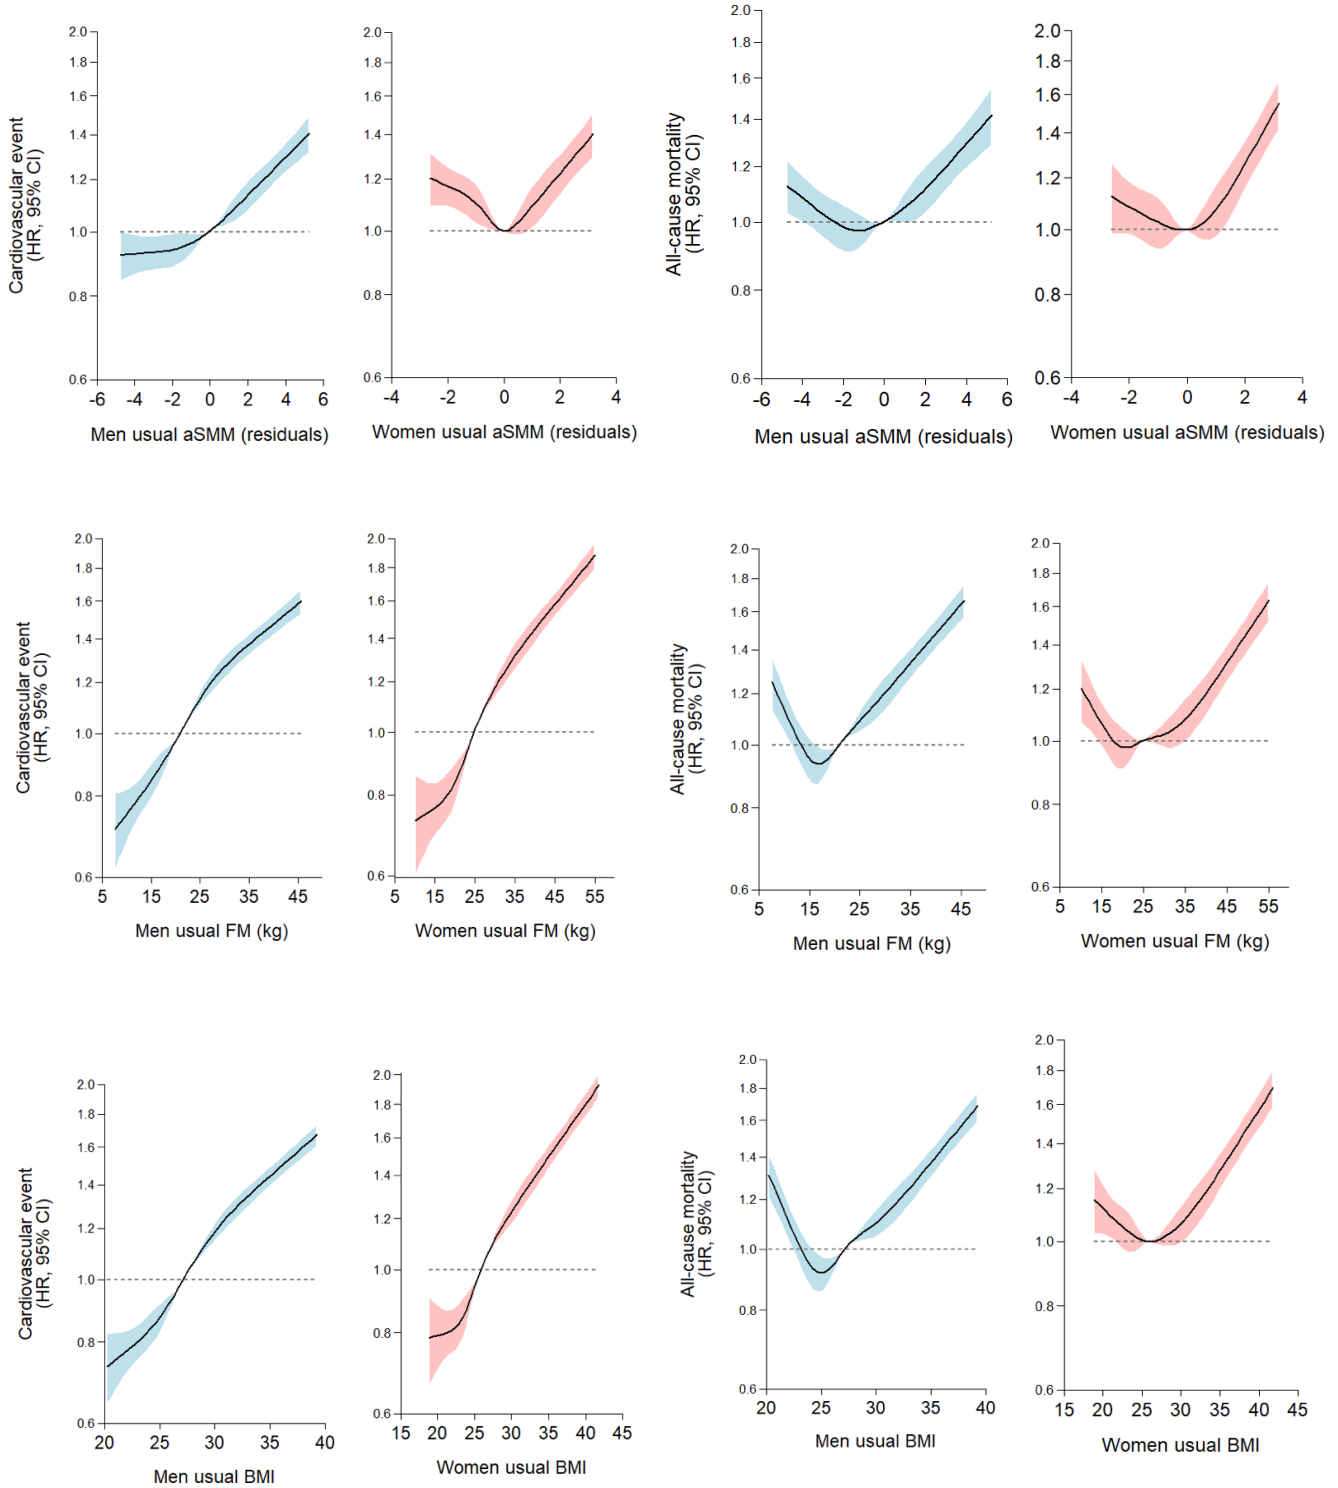

Figure S3. Associations with CVD subtypes.

Adjusted hazard ratios for the association between cardiovascular disease (CVD) subtypes (coronary heart disease, stroke and congestive heart failure) with i) appendicular skeletal muscle mass (aSMM) and ii) fat mass (FM)

i) Appendicular skeletal muscle mass

ii) Fat mass

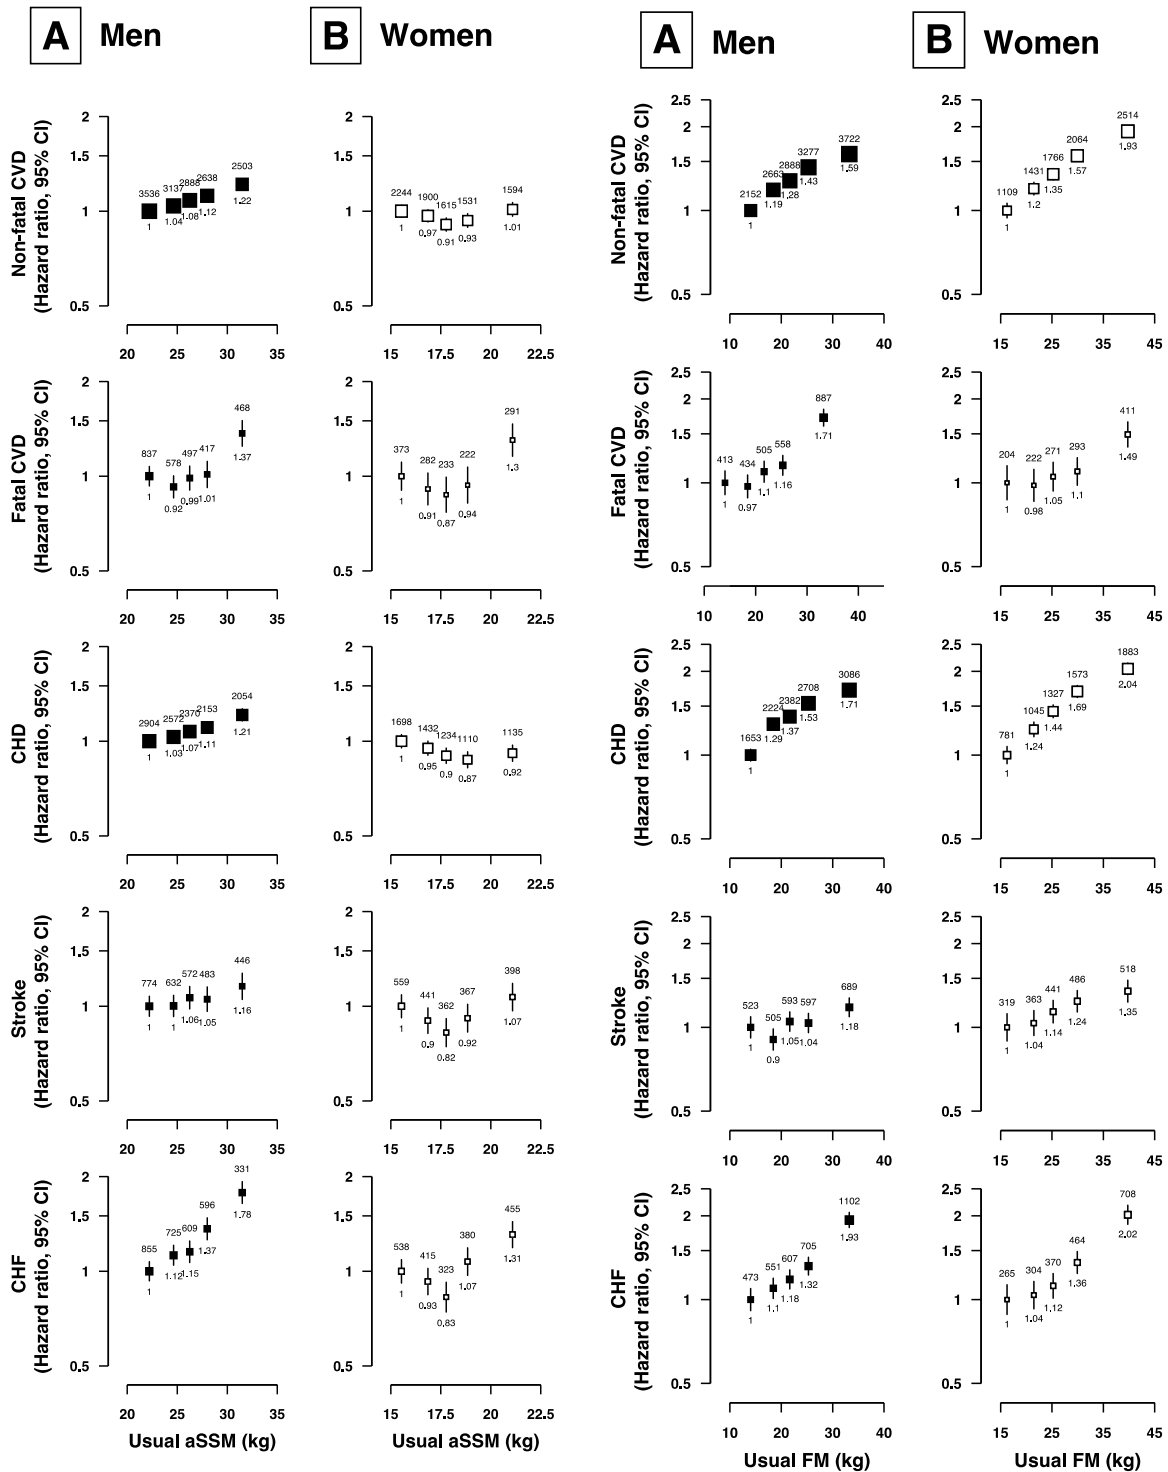

i A, adjusted hazard ratios for the association between CVD subtypes with aSMM in men. i B, adjusted hazard ratios for the association between CVD subtypes with aSMM in women. ii A, adjusted hazard ratios for the association between CVD subtypes with FM in men. ii B, adjusted hazard ratios for the association between CVD subtypes with FM in women

Adjusted hazard ratios (HR) and 95% group-specific confidence intervals (CI) obtained using floated absolute risk method of Cox proportional hazard regression. Adjusted for age at risk, Townsend index of deprivation, education, smoking status, alcohol intake, physical activity, oily fish intake, fruit and vegetable intake, saturated fat intake, diabetes, cancer history, menopause (women), and mutually adjusted for FM and ASM. Height is adjusted for by inclusion as continuous variable for FM and by regression out of variation due to height for ASM. HRs are plotted at the mean of the resurvey values for the baseline-defined quintiles ("usual" values) to correct for measurement error.
